# Supplementary material
Source: PubMed Central journal article supplement (PMC3406929)
Supplement: NIHMS383049-supplement-Supplemental.pdf [file NIHMS383049-supplement-Supplemental.pdf]

# Supplementary Information

## Structure of HIV-1 gp120 V1V2 domain with broadly neutralizing antibody PG9

Jason S. McLellan<sup>1#</sup>, Marie Pancera<sup>1#</sup>, Chris Carrico<sup>2</sup>, Jason Gorman<sup>1</sup>, Jean-Philippe Julien<sup>3</sup>, Reza Khayat<sup>3</sup>, Robert Louder<sup>1</sup>, Robert Pejchal<sup>3</sup>, Mallika Sastry<sup>1</sup>, Kaifan Dai<sup>1</sup>, Sijy O'Dell<sup>1</sup>, Nikita Patel<sup>4</sup>, Syed Shahzad-ul-Hussan<sup>1,5</sup>, Yongping Yang<sup>1</sup>, Baoshan Zhang<sup>1</sup>, Tongqing Zhou<sup>1</sup>, Jiang Zhu<sup>1</sup>, Jeffrey C. Boyington<sup>1</sup>, Gwo-Yu Chuang<sup>1</sup>, Devan Diwanji<sup>3</sup>, Ivelin Georgiev<sup>1</sup>, Young Do Kwon<sup>1</sup>, Doyung Lee<sup>1</sup>, Mark K. Louder<sup>1</sup>, Stephanie Moquin<sup>1</sup>, Stephen D. Schmidt<sup>1</sup>, Zhi-Yong Yang<sup>1</sup>, Mattia Bonsignori<sup>6</sup>, John A. Crump<sup>7,8</sup>, Saidi H. Kapiga<sup>9</sup>, Noel E. Sam<sup>8,9</sup>, Barton F. Haynes<sup>6</sup>, Dennis R. Burton<sup>10,11</sup>, Wayne C. Koff<sup>12</sup>, Laura M. Walker<sup>10</sup>, Sanjay Phogat<sup>12</sup>, Richard Wyatt<sup>10</sup>, Jared Orwenyo<sup>13</sup>, Lai-Xi Wang<sup>13</sup>, James Arthos<sup>4</sup>, Carole A. Bewley<sup>5</sup>, John R. Mascola<sup>1</sup>, Gary J. Nabel<sup>1</sup>, William R. Schief<sup>2,10</sup>, Andrew B. Ward<sup>3</sup>, Ian A. Wilson<sup>3</sup>, and Peter D. Kwong<sup>1\*</sup>

<sup>1</sup> Vaccine Research Center, National Institute of Allergy and Infectious Diseases, National Institutes of Health, Bethesda, MD 20892, USA.

<sup>2</sup> Department of Biochemistry, University of Washington, Seattle, WA 98195, USA.

<sup>3</sup> Department of Molecular Biology and the Skaggs Institute for Chemical Biology, The Scripps Research Institute, La Jolla, California, USA.

<sup>4</sup> Laboratory of Immunoregulation, National Institutes of Allergy and Infectious Diseases, National Institutes of Health, Bethesda, MD 20892, USA.

<sup>5</sup> Laboratory of Bioorganic Chemistry, National Institute of Diabetes and Digestive and Kidney Diseases, National Institutes of Health, Bethesda, MD 20892, USA.

<sup>6</sup> The Duke Human Vaccine Institute, Duke University School of Medicine, and Duke University Medical Center, Durham, North Carolina 27710, USA.

<sup>7</sup> Division of Infectious Diseases and International Health, Department of Medicine, and Department of Pathology, Duke University Medical Center, Durham, North Carolina 27710, USA.

<sup>8</sup> Kilimanjaro Christian Medical Centre and Kilimanjaro Christian Medical College, Tumaini University, Moshi, Tanzania.

<sup>9</sup> Kilimanjaro Reproductive Health Programme, Moshi, Tanzania.

<sup>10</sup> Department of Immunology and Microbial Science and IAVI Neutralizing Antibody Center, The Scripps Research Institute, La Jolla, California 92037, USA.

<sup>11</sup> Ragon Institute of MGH, MIT, and Harvard, Cambridge, Massachusetts 02129, USA.

<sup>12</sup> International AIDS Vaccine Initiative (IAVI), New York, NY 10038, USA.

<sup>13</sup> Institute of Human Virology and Department of Biochemistry & Molecular Biology, University of Maryland School of Medicine, Baltimore, Maryland 21201, USA.

<sup>#</sup>Equal contribution

\*Correspondence should be addressed to P.D.K. Vaccine Research Center, NIAID/NIH  
40 Convent Drive; Building 40, Room 4508, Bethesda, MD 20892; Phone: (301) 594-8685; Fax: (301) 480-2658, E-mail:  
pdkwong@nih.gov.

## Table of contents

|                                                                                                                                                             |    |
|-------------------------------------------------------------------------------------------------------------------------------------------------------------|----|
| Supplementary Table 1. Variational crystallization of gp120s containing the V1V2 region.....                                                                | 4  |
| Supplementary Table 2. Expression of large V1V2 scaffolds .....                                                                                             | 5  |
| Supplementary Table 3. V1V2 scaffolds .....                                                                                                                 | 6  |
| Supplementary Table 4. Peptide mapping of V1V2-directed murine monoclonal antibodies .....                                                                  | 8  |
| Supplementary Table 5. Antibody and integrin recognition of YU2 V1V2 scaffolds .....                                                                        | 9  |
| Supplementary Table 6. ELISA binding of PG9 and PG16 to clade B and C gp120 monomers.....                                                                   | 10 |
| Supplementary Table 7. Data collection and refinement statistics for V1V2 scaffolds complexed with PG9 Fab .....                                            | 11 |
| Supplementary Table 8. Structural characterization of HIV-1 gp120 .....                                                                                     | 12 |
| Supplementary Table 9. Interactions between CAP45 V1V2 scaffold and PG9 Fab.....                                                                            | 13 |
| Supplementary Table 10. Interactions between ZM109 V1V2 scaffold and PG9 Fab .....                                                                          | 16 |
| Supplementary Table 11. EC <sub>50</sub> (μg/mL) of PG9 and PG16 binding to V1V2 scaffolds and to associated glycosylation mutants .....                    | 18 |
| Supplementary Table 12. PG9/PG16 heavy chain affinity maturation and CAP45/ZM109 V1V2 recognition* .....                                                    | 19 |
| Supplementary Table 13. PG9/PG16 light chain affinity maturation on CAP45/ZM109 V1V2 recognition* .....                                                     | 20 |
| Supplementary Table 14. Structural effect of V1V2 mutations on PG9 neutralization .....                                                                     | 21 |
| Supplementary Table 15. Neutralization activity of PG9, PG16, VRC01, 2F5 and 2G12 against a cross-clade panel of 178 pseudoviruses (IC <sub>50</sub> )..... | 22 |
| Supplementary Table 16. Neutralization activity of mAbs against a cross-clade panel of 178 pseudoviruses (IC <sub>50</sub> ) .....                          | 23 |
| Supplementary Table 16 (cont'd). Neutralization activity of mAbs against a cross-clade panel of 178 pseudoviruses (IC <sub>50</sub> ).....                  | 24 |
| Supplementary Table 16 (cont'd). Neutralization activity of mAbs against a cross-clade panel of 178 pseudoviruses (IC <sub>50</sub> ).....                  | 25 |
| Supplementary Table 16 (cont'd). Neutralization activity of mAbs against a cross-clade panel of 178 pseudoviruses (IC <sub>50</sub> ).....                  | 26 |
| Supplementary Table 17. Neutralization activity of mAbs against a cross-clade panel of 178 pseudoviruses (IC <sub>80</sub> ) .....                          | 27 |
| Supplementary Table 18. Data collection and refinement statistics for gp120-T13.....                                                                        | 31 |
| Supplementary Table 19. Data collection and refinement statistics for unbound Fabs from V1V2-directed broadly neutralizing antibodies.....                  | 32 |
| Supplementary Table 20. CH01-04 crystallization.....                                                                                                        | 33 |
| Supplementary Table 21. V1V2 and PG9 interface surface areas .....                                                                                          | 34 |
| Supplementary Figure 1. V1V2 β-hairpins stubs in previously determined core structures of HIV-1 and SIV. .                                                  | 35 |
| Supplementary Figure 2. Scaffold proteins used to host V1V2 regions.....                                                                                    | 36 |
| Supplementary Figure 3. HIV-1 gp120 V1V2 scaffolds interact with gut-homing receptor, integrin α <sub>4</sub> β <sub>7</sub> . .....                        | 37 |
| Supplementary Figure 4. Binding of HIV-1 ZM109 gp120 and V1V2 scaffolds to antibody PG9. ....                                                               | 38 |
| Supplementary Figure 5. PG9 tyrosine sulfate (TYS) characterization. ....                                                                                   | 39 |
| Supplementary Figure 6. On-column complex formation and purification.....                                                                                   | 40 |

|                                                                                                                                                                                     |    |
|-------------------------------------------------------------------------------------------------------------------------------------------------------------------------------------|----|
| Supplementary Figure 7. Structure of PG9 in complex with the V1V2 region from HIV-1 strain ZM109.....                                                                               | 41 |
| Supplementary Figure 8. Glycan recognition of CAP45 V1V2 by PG9. ....                                                                                                               | 42 |
| Supplementary Figure 9. HIV-1 strains with V1V2 regions lacking an <i>N</i> -linked glycan at position 156. ....                                                                    | 43 |
| Supplementary Figure 10. Negative-stained reference-free 2D-class averages of the 128 classes calculated from untilted micrographs collected for the random conical tilt (RCT)..... | 44 |
| Supplementary Figure 11. Negative-stained reference-free 2D-class averages compared to raw particles.....                                                                           | 45 |
| Supplementary Figure 12. 6Å crystal structure of JR-FL gp120 core bound to T13 Fab. ....                                                                                            | 46 |
| Supplementary Figure 13. Negative stain of gp120-T13 and gp120-T13-PG9 complex. ....                                                                                                | 47 |
| Supplementary Figure 14. Functional definition of PG16 paratope by “arginine-scanning” mutagenesis.....                                                                             | 48 |
| Supplementary Figure 15. PG9 and PG16 binding to gp120 in the presence and absence of the V3 loop.....                                                                              | 49 |
| Supplementary Figure 16. PG9 CDR H3 electron density in unbound and V1V2-bound structures.....                                                                                      | 50 |
| Supplementary Figure 17. Unbound structures of CH04 Fab and of chimeric CH04H/CH02L Fab.....                                                                                        | 51 |
| Supplementary Figure 18. Unbound structure of PGT145 Fab. ....                                                                                                                      | 52 |
| Supplementary Figure 19. Binding of GlcNAc2 to PG9 by NMR.....                                                                                                                      | 53 |
| Supplementary Figure 20. Binding of mannopentaose to PG9 by NMR. ....                                                                                                               | 54 |

**Supplementary Table 1. Variational crystallization of gp120s containing the V1V2 region**

| Complex # | gp120                | Ligands |     |     |       |        |        | # Ligands | Hits |
|-----------|----------------------|---------|-----|-----|-------|--------|--------|-----------|------|
|           |                      | D1D2    | 17b | 48d | M48U1 | NBD557 | BMS806 |           |      |
| 1         | YU2 44-492 ΔV3       |         |     |     |       |        |        | 0         | 0    |
| 2         | YU2 44-492 ΔV3       | X       |     | X   |       |        |        | 2         | 0    |
| 3         | YU2 44-492 ΔV3       | X       | X   |     | X     |        |        | 3         | 0    |
| 4         | YU2 44-492 ΔV3       | X       |     | X   | X     |        |        | 3         | 0    |
| 5         | YU2 83-491 ΔV3 new   | X       |     | X   |       |        |        | 2         | 0    |
| 6         | YU2 83-491 ΔV3 new   | X       | X   |     |       |        |        | 2         | 0    |
| 7         | YU2                  |         |     |     |       |        |        | 0         | 0    |
| 8         | C1086 44-492 ΔV3     | X       |     |     |       |        |        | 0         | 0    |
| 9         | ZM53 44-492          | X       | X   |     |       |        |        | 2         | 0    |
| 10        | ZM53 44-492          |         |     |     |       |        |        | 0         | 0    |
| 11        | ZM53 44-492          |         |     |     |       | X      |        | 1         | 0    |
| 12        | ZM53 44-492          |         |     |     |       |        | X      | 1         | 1    |
| 13        | ZM53 44-492 glyc     |         |     |     |       |        |        | 0         | 0    |
| 14        | ZM109 44-492         |         |     |     |       |        |        | 0         | 0    |
| 15        | ZM109                |         |     |     |       |        | X      | 1         | 0    |
| 16        | ZM109                |         |     |     |       |        |        | 0         | 0    |
| 17        | ZM197 44-492         |         |     |     |       |        | X      | 1         | 0    |
| 18        | CAP45 44-492         |         |     |     |       |        | X      | 1         | 0    |
| 19        | ZM248M 44-492        |         |     |     |       |        |        | 0         | 0    |
| 20        | ZM249M 44-492 glyc   |         |     |     |       |        |        | 0         | 0    |
| 21        | DU123.06             |         |     |     |       |        |        | 0         | 0    |
| 22        | DU172.17             |         |     |     |       |        |        | 0         | 0    |
| 23        | CAP244               |         |     |     |       |        |        | 0         | 0    |
| 24        | HXBc2 83-491 ΔV3 new | X       | X   |     |       |        |        | 2         | 0    |
| 25        | SF162 44-492 ΔV3     | X       |     | X   |       |        |        | 2         | 0    |
| 26        | SF162 44-492 ΔV3 new |         |     |     |       |        |        | 0         | 0    |

Mammalian codon-optimized genes encoding full length, 44-492 (HXBc2 numbering), or V3 loop-deleted gp120s from various strains were synthesized with a human CD5 leader (ΔV3: V3 residues have been replaced as follows: 297-GAG-330, ΔV3 new: V3 residues have been replaced as follows: 302-GGSGSGG-325). The genes were cloned into the XbaI/BamHI sites of the mammalian expression vector pVRC8400, and transiently transfected into HEK293S GnTI<sup>-/-</sup> cells. gp120 proteins were purified from the media using a 17b affinity column, eluted with IgG elution buffer (Pierce) and immediately neutralized by adding 1M Tris-HCl pH 8.5. The proteins were flash frozen in liquid nitrogen and stored at -80 °C until further use. Complexes or unbound gp120 (with and without N-linked glycans) were used for crystallization screening. All proteins were passed over a 16/60 S200 size exclusion column. Monodisperse fractions were pooled, and after concentration, proteins were screened against 576 crystallization conditions using a Cartesian Honeybee crystallization robot. Initial crystals were grown by the vapor diffusion method in sitting drops at 20°C by mixing 0.2 μl of protein complex with 0.2 μl of reservoir solution.

**Supplementary Table 2. Expression of large V1V2 scaffolds**

| Scaffold PDB ID* | Chain ID | Expression (mg/L) |
|------------------|----------|-------------------|
| 1DQG             | A        | 1.0               |
| 3HEI             | A        | <0.1              |
| 3AL9             | A        | <0.1              |
| 3FBX             | A        | <0.1              |
| 2BCE             | A        | <0.1              |
| 3HRZ             | D        | <0.1              |

\*Scaffolds described in Supplementary Table 3.

Supplementary Table 3. V1V2 scaffolds

| PDB  | Protein                                                 | Length <sup>i</sup> | Insertion <sup>ii</sup> | Mutations/Insertions                            | Sequence As Computationally Designed <sup>iii</sup>                                                                                                                                                                                                                                                                                                                                                                                                                                                                                                                                             |
|------|---------------------------------------------------------|---------------------|-------------------------|-------------------------------------------------|-------------------------------------------------------------------------------------------------------------------------------------------------------------------------------------------------------------------------------------------------------------------------------------------------------------------------------------------------------------------------------------------------------------------------------------------------------------------------------------------------------------------------------------------------------------------------------------------------|
| 1CHL | <i>L quinquestriatus</i> chlorotoxin                    | 36                  | 30-31                   | Y29A                                            | MCMPCFTTDHQMARCDDCCGGKGRGKACV <b>GAGSCCTCLCR</b>                                                                                                                                                                                                                                                                                                                                                                                                                                                                                                                                                |
| 2BRZ | <i>P brazzeana</i> sweet protein                        | 54                  | 39-45                   | None                                            | DKCKKVYENYPVSKCQLANQCNYDCKLKD KHARSGECF <b>CVGAGSCQCICDYCEY</b>                                                                                                                                                                                                                                                                                                                                                                                                                                                                                                                                 |
| 1IW4 | <i>H roretzi</i> trypsin inhibitor                      | 55                  | 25-30                   | E31Q, E32T                                      | AHMDCTEFNPLCRCNKMLGLDIC <b>CVGAGSCQT</b> HRNMCALCCEHPGGFEYSNGPCE                                                                                                                                                                                                                                                                                                                                                                                                                                                                                                                                |
| 1FD6 | Designed Protein G B1 domain                            | 57                  | 9-15                    | I7A, I8A, G15Q, E16T                            | MTTFKLAAC <b>CVGAGSCQ</b> TTTTTEAVDAATAEKVFKQYANDNGIDGEWTYDDATKTFTVTE                                                                                                                                                                                                                                                                                                                                                                                                                                                                                                                           |
| 1JO8 | Stabilized <i>S cerevisiae</i> Abp1 SH3 domain          | 58                  | 42-43                   | None                                            | GPWATALYDYDAEDNELTFKEGDKIINIEFVDDDWLGELE <b>CVGAGSCGSKGLF</b> PSNYVSLGN                                                                                                                                                                                                                                                                                                                                                                                                                                                                                                                         |
| 1E6G | Chicken spectrin SH3 domain                             | 62                  | 46-49                   | I25V                                            | TGKELVLVLYDYQEKSRELTVKKGDILTLLNSTNKDWWK <b>VECVGAGSCQGFIPAA</b> YLKLD                                                                                                                                                                                                                                                                                                                                                                                                                                                                                                                           |
| 1G6M | <i>Naja kaouthia</i> CBT 2                              | 62                  | 32-33                   | D31L, G34N                                      | LECHNQSSQTPTTTTGCSGGENNCYKKEWRL <b>CVGAGSCNYRTERGCGCPSVKKGIGINCCTTDR</b> CNN                                                                                                                                                                                                                                                                                                                                                                                                                                                                                                                    |
| 1QPM | Mu phage repressor domain                               | 69                  | 38-44                   | K37L, A45V                                      | KSIWCSPQEIMAADGMPGSVAGVHYRANVQGWTKRKFC <b>VGAGSCTVEYD</b> VMSMPTKEREQVIAHLGLST                                                                                                                                                                                                                                                                                                                                                                                                                                                                                                                  |
| 1XQQ | <i>H sapiens</i> ubiquitin                              | 76                  | 46-47                   | F45L, K48Q                                      | MQIFVKTLTGKTITLEVEPSDTIENVKAKIQDKEGIPPDQQRLI <b>ACVGAGSCQ</b> LEDGRTLSDYNIQKES TLHLVLRRLGG                                                                                                                                                                                                                                                                                                                                                                                                                                                                                                      |
| 1IP9 | <i>S cerevisiae</i> PB1 domain                          | 85                  | 20-21                   | Y19L, D22N, D84P                                | GAMGSSTSGLKTTKIKFYLC <b>VGAGSCNIFALMLK</b> GDTTYKELRSKIAPRIDTDNFKLQTKLFDGSGEEIKTDSQVSNIIQAKLKISVHPI                                                                                                                                                                                                                                                                                                                                                                                                                                                                                             |
| 1XBD | <i>C fimi</i> xylan binding domain                      | 87                  | 53-59                   | G51P, S52L, T60N                                | TGCSVTATRAEEWSDRFNVTYSVSGSSAWTVNLALNGSQTIQASWNANVT <b>DCVGAGSCTR</b> TVTPN GSGNTFGVTVMKNGSSTTPAATCAGS                                                                                                                                                                                                                                                                                                                                                                                                                                                                                           |
| 1DQG | <i>M musculus</i> mannose receptor cysteine-rich domain | 135                 | 19-23                   | VGS inserted pre-V1V2, YFF inserted post-V1V2   | LDARQFLIYNEDHKRCVDAVG <b>SCVGAGSCYFFV</b> QTATCNPEAESQKFRWVSDSQIMSVAFKLCLGVP SKTDWASVTLYACDSKSEYQKWECKNDTLFGIKGTELYFNNGNRQEKNIKLYKGSGLWSRWKVYGT TDDLCSRGYE                                                                                                                                                                                                                                                                                                                                                                                                                                      |
| 3HEI | <i>H sapiens</i> ephrin receptor 2 fragment             | 160                 | 30-37                   | VLV inserted pre-V1V2, LfV inserted post-V1V2   | EVVLLDFAAAGGELGWLTHPYGKGWDLMQVLV <b>CVGAGSCLFVYMYSVCNVMSGDQDNWLRTNW</b> VYRGEAERIFIELKFTVRDCNSFPGGASSCKETFN LYYAESDLDYGTNFQKRLFTKIDTIAPDEITVSSDF EARHVKLNVEERSVGPLTRKGFYLAQDIGACVALLSVRVYYKCC                                                                                                                                                                                                                                                                                                                                                                                                   |
| 3AL9 | <i>M musculus</i> plexin A2                             | 539                 | 255-258                 | WYED inserted pre-V1V2, DRVF inserted post-V1V2 | GTTGMPQYSTFHSENRDWTFNHLTVHRRTGAVYVGAINRVYKLTGNLTIQVAHKTGPEEDNKACYPP LIVQPCSEVLTLTNNVNKLLIIDYSENRLACGSLY QGVCKLLRLDDLFI LVEPSHKKEHYLSSVNKTGT MYGVIVRSEGEDGKLFIGTAVDGKQDYFPTLSSR KLPRDPRESSAMLDYELHSDFVSSLIKIPSDTLALVS HFDIFYIYG FASGGFVYFLTVQPETPDGMAINSAG DLFYTSRIVRLCKDDPKFHSYVSLPFGCWYED <b>CVGAGSCDRVFYRLLQAA</b> YLAKPGEALAQAFNISSD EDVLF AIFSKGQKQYHHPDDSA LCAFPRAINLQI KERLQSCYHGEGNLELNWLLGKDVQCTKAPVPI DDNFCGLDINQPLGGSTPVEGLTLYTTSRDRLTSV ASYVYNGYSVVVFGTKSGKLLKIRADGPPHGGV QYEMVSVFKDGPILRDMAFSINQLYL YVMSE RQ VTRVPVESCEQYTT CGECLSSGDPHCGWALHN MCSRRDKCQRAW EANRFAASISQCMSSRENLYF Q |

|      |                                         |     |         |                                                 |                                                                                                                                                                                                                                                                                                                                                                                                                                                                                                                                                                                                                                                                                                                                                                                                                                                                  |
|------|-----------------------------------------|-----|---------|-------------------------------------------------|------------------------------------------------------------------------------------------------------------------------------------------------------------------------------------------------------------------------------------------------------------------------------------------------------------------------------------------------------------------------------------------------------------------------------------------------------------------------------------------------------------------------------------------------------------------------------------------------------------------------------------------------------------------------------------------------------------------------------------------------------------------------------------------------------------------------------------------------------------------|
| 3FBX | <i>M musculus</i><br>lysosomal protein  | 559 | 183-188 | YAW inserted pre-V1V2, LGM inserted post-V1V2   | LPTLGPGWQRQNPDPVSRTRSLLLDAAASGQLRL<br>EDGFHPDAVAWANLTNAIRETGWAYLDLSTNGR<br>YNDLQAYAAAGVVEASVSEELIYMHWMNTVNN<br>YCGPFEYEVGYCEKLNKFNLEANLEWMQREMELN<br>PDSFYWHQVRLTLLQLKGLLEDSEYEGRLTFPTGRF<br>TIKPLGFLLLQISGDLEDLEPALNKTNTKPSLGS<br>SALIKLYAWCVGAGSCLGMLLVAHNTWNSYQN<br>MLRIKKYRLQFREGPQEEYPLVAGNNLVFSSYPG<br>TIFSGDDFYILGSLVTLETTIGNKNPALWKYVQP<br>QGCVLEWIRNVVANRLALDGTWADVFKRFNSG<br>TYNNQWMIVDYKAFLPGGSPGSRVLTILEQIPG<br>MVVVADKTAELYKTTYWASYNIPYFETVFNASG<br>LQALVAQYGDWFSYTKNPRAKIFQRDQSLVEDM<br>DAMVRLMRYNDFLHDPLSLCEACNPKPNAENAS<br>ARSDLNPANGSYPFQALHQRAGHGIDVKVTSFTL<br>AKYMSMLAASGPTWDQCPPFQWSKSPFHSMHLH<br>MGQPDLMFSPIRVPWDGRGS                                                                                                                                                                                                                       |
| 2BCE | <i>B taurus</i> cholesterol<br>esterase | 579 | 19-26   | DGT inserted pre-V1V2 LVP inserted post-V1V2    | AKLGSVYTEGGFVEGVNKGDT <b>CVGAGSCL</b> VPVD<br>IFKGIPFAAAPKALEKPERHPGWQGTAKAKSFKK<br>RCLQATLTQDSTYGNEDCLYLNIVVPQGRKEVSH<br>DLPVMIWIYGGAFLMGASQGANFLSNLYLDGEEI<br>ATRGNVIVVTFNYRVGPLGFLSTGDSNLPNGYGL<br>WDQHMAIAWVKRNIEAFGGDPDQITLFGESAGG<br>ASVSLQTLSPYNKGLIKRAISQSGVGLCPWAIQQD<br>PLFWAKRIAEEKVGCVDDTSKMAGCLKITDPRAL<br>TLAYKLPLGSTYEPKLHLYSFPVVIDGDFIPDDPV<br>NLYANAADVYIAGTNDMDGHLFVGMVDPAIN<br>NKQDVTEEDFYKLVSGLTVTKGLRGAQATYEVY<br>TEPWAQDSSQETRKKTMVDLETDILFLIPTKIAVA<br>QHKSHAKSANTYTYLFSQPSRMPIYPKWGMGADH<br>ADDLQYVFGKPFATPLGYRAQDRTVSKAMIAYW<br>TNFARTGDPNTGHSTVPANWDPYTLLEDDNYLEIN<br>KQMDSNSMKLHLRTNYLQFWTQTYQALPTVTS<br>GASLLPEDNSQASPVPPADNSGAPTEPSAGDSEV<br>AQMPVVIGF                                                                                                                                                                              |
| 3HRZ | <i>H sapiens</i><br>complement factor B | 741 | 444-449 | KWAL inserted pre-V1V2, QFFM inserted post-V1V2 | TPWSLARPPQGSCLGVEIKGGSFRLLEGGQALEY<br>VCPSGFYPPVQTRTCRSTGWSWTLKTQDQKTVR<br>KAECRAIHCPRPHDFENGEYWRSPYYNVSDSEISF<br>HCYDGYTLRGSANRTCQVNGRWSGQTAICDNGA<br>GYCSNPGIPIGTRKVGSRQYRLEDSEVYHCSRGLTL<br>RGSQRRTCQEGGSWSGTEPSCQDSFMYDTPQEVA<br>EAFSSLTETIEGVDAEDGHGPGEQQKRKIVLDPS<br>GSMNIYLVLDGSGSIGASDFTGAKKCLVNLIEKV<br>ASYGVKPRYGLVTYATYPKIWKVSEADSSNAD<br>WVTKQLNEINYEDHKLKSGTNTKKALQAVYSM<br>MSWPDDVPPEGWNRTRHVIILMTDGLHNMGGDP<br>ITVIDEIRDLLYIGKDRKNPREDYLDVYVFGVGPL<br>VNQVNINALASKKDNEQHVFKVKDMENLEDVYF<br>QMIDESQSLSLCGMVWEHRKGTDYHKQPWQAKI<br>KWAL <b>CVGAGS</b> CQFFMCMGAVVSEYFVLTAHC<br>FTVDDKEHSIKVSVGGKEKRDLEIEVVLVHPNYNIN<br>GKKEAGIPEFYDYDVALIKLKNKLKYGQTIRPICL<br>PCTEGTTRALRLPPTTTCCQQKEELLPAQDIKALF<br>VSEEEKLTRKEVYIKNGDKKGCERDAQYAPG<br>YDKVKDISEVVTPRFLCTGGVSPYADPNTCRGDS<br>GGPLIVHKRSRFIQGVISWGVVDVCKNQKRQKQ<br>VPAHARDFHINLFQVLPWLKEKLQDEDLGFLLA |

<sup>i</sup>Number of residues before deletion of native segment and insertion of V1V2 stub.

<sup>ii</sup>Residue range listed was removed from the native structure for the V1V2 insertion procedure.

<sup>iii</sup>CVGAGSC is a placeholder sequence for the V1V2 stub used in our modeling software, derived from PDB ID 1RZJ. Any V1V2 sequence can likely be inserted in place of the stub.

**Supplementary Table 4. Peptide mapping of V1V2-directed murine monoclonal antibodies**

| Protein or peptide                         | SBS01 | SBS02 | SBS03 | SBS04 | SBS05 | SBS06 | F105 | 9E8 |
|--------------------------------------------|-------|-------|-------|-------|-------|-------|------|-----|
| YU2gp120FL                                 | ++    | ++    | ++    | ++    | ++    | ++    | ++   | -   |
| YU2gp120 $\Delta$ V1V2                     | -     | -     | -     | -     | -     | -     | ++   | -   |
| V1 (T <sub>133</sub> -E <sub>147</sub> )   | -     | -     | -     | -     | -     | -     | -    | -   |
| V1 (S <sub>143</sub> -C <sub>157</sub> )   | -     | +     | -     | -     | ++    | -     | -    | -   |
| V1V2 (E <sub>153</sub> -D <sub>167</sub> ) | -     | -     | -     | -     | -     | -     | -    | -   |
| V2 (T <sub>163</sub> -Y <sub>177</sub> )   | +     | -     | +/-   | +     | -     | -     | -    | -   |
| V2 (Y <sub>173</sub> -A <sub>187</sub> )   | -     | -     | -     | -     | -     | -     | -    | -   |
| V2 (P <sub>183</sub> -S <sub>197</sub> )   | -     | -     | -     | -     | -     | +/-   | -    | -   |
| V2 (S <sub>193</sub> -S <sub>207</sub> )   | -     | -     | -     | -     | -     | -     | -    | -   |

Monoclonal antibodies against the V1V2 domain were obtained from ProSci. These antibodies were generated by immunizing mice with YU2 gp120 and the sera were tested against YU2 gp120  $\Delta$ V1V2 to select positive wells. Six YU2-V1V2 specific monoclonal antibodies (SBS01-06, subtype IgG1, IgG2a) were obtained. Peptide mapping was performed by ELISA. Serial dilutions of the six V1V2-directed antibodies were added to YU2 V1V2 peptide-coated wells and binding was probed with horseradish peroxidase-conjugated anti-mouse IgG antibody. YU2 gp120 and gp120  $\Delta$ V1V2 were used as positive and negative controls, respectively. Anti-HIV-1 antibody F105 and anti influenza hemagglutinin antibody 9E8 were also used as control antibodies.



**Supplementary Table 5. Antibody and integrin recognition of YU2 V1V2 scaffolds**

|                        | SBS01 | SBS02 | SBS03 | SBS04 | SBS05 | SBS06 | $\alpha_4\beta_7$ |
|------------------------|-------|-------|-------|-------|-------|-------|-------------------|
| YU2gp120 FL            | ++    | ++    | ++    | ++    | ++    | ++    | +                 |
| YU2gp120 $\Delta$ V1V2 | -     | -     | -     | -     | -     | -     | -                 |
| 1FD6 V1V2*#            | ++    | ++    | ++    | ++    | ++    | ++    | +                 |
| 1XQQ V1V2              | +/-   | +/-   | +/-   | +/-   | +/-   | -     | -                 |
| 1XBD V1V2              | -     | -     | -     | -     | -     | -     | ND                |
| 2BRZ V1V2              | -     | -     | -     | -     | -     | -     | ND                |
| 1IW4 V1V2              | -     | -     | -     | +/-   | -     | -     | ND                |
| 1G6M V1V2              | -     | -     | -     | -     | +/-   | -     | ND                |
| 1QPM V1V2              | +/-   | -     | +/-   | +/-   | +/-   | -     | -                 |
| 1JO8 V1V2#             | +/-   | +/-   | +/-   | +/-   | +/-   | +/-   | +                 |
| 1E6G V1V2#             | +/-   | +/-   | +/-   | +/-   | +/-   | +/-   | -                 |
| 1IP9 V1V2              | -     | -     | -     | -     | -     | -     | ND                |
| 1CHL V1V2              | -     | -     | -     | -     | -     | -     | ND                |

\*1FD6 scaffold protein is a variant of the B1 domain of streptococcal protein G, which binds the Fc region of antibodies and could contribute to binding in the ELISA assay, however this scaffold also binds  $\alpha_4\beta_7$  in the competition assay.

#These scaffold proteins were tested with surface plasmon resonance and biolayer interferometry.

Antigenic analysis of the YU2 V1V2 scaffolds was initially performed by sandwich ELISA. YU2 V1V2 scaffolds were expressed as GFP fusion proteins. The expressed V1V2 scaffold proteins in culture supernatants were added in duplicate to wells coated with a goat polyclonal anti-GFP antibody (Santa Cruz) to allow capture of the desired protein. SBS01-06 proteins were used as detection antibodies and binding was probed with horseradish peroxidase-conjugated anti-mouse IgG antibody. Full length YU2 gp120,  $\Delta$ V1V2, and secreted GFP were used as control proteins and antibodies. A subset of purified V1V2 scaffold proteins was antigenically characterized by surface plasmon resonance and biolayer interferometry.

**Supplementary Table 6. ELISA binding of PG9 and PG16 to clade B and C gp120 monomers**

| gp120       | Clade B |      |       |        | Clade C and negative controls |      |      |       |        |
|-------------|---------|------|-------|--------|-------------------------------|------|------|-------|--------|
|             | PG9     | PG16 | VRC01 | HIV-IG | gp120                         | PG9  | PG16 | VRC01 | HIV-IG |
| 6535.3      | +++     | +++  | ++++  | +++    | CAP45.2.00.G3                 | ++++ | +++  | +++   | +++    |
| AC10.0.29   | ++      | -    | +++   | +++    | CAP210.2.00.E8                | +    | -    | ++    | +++    |
| BaL.01      | ++++    | -    | ++++  | +++    | CAP244.2.00.D3                | -    | -    | +++   | +++    |
| CAAN5342.A2 | +++     | +    | ++++  | +++    | Du151.2                       | +    | -    | ++++  | +++    |
| HXB2        | ++      | -    | ++++  | +++    | Du156.12                      | ++   | -    | ++++  | +++    |
| PVO.4       | +       | -    | +++   | +++    | Du172.17                      | +++  | -    | +     | +++    |
| QH0692.42   | -       | -    | ++++  | +++    | Du422.1                       | ++   | -    | -     | +++    |
| R2          | -       | -    | +++   | +++    | ZM53M.PB12                    | ++++ | +++  | ++++  | +++    |
| REJO4541.67 | +++     | +    | ++++  | +++    | ZM109F.PB4                    | ++++ | +++  | ++++  | +++    |
| RHPA4259.7  | ++      | -    | ++++  | +++    | ZM135M.PL10a                  | -    | -    | +++   | +++    |
| SC422661.8  | ++++    | +    | ++++  | +++    | ZM197M.PB7                    | ++++ | ++   | ++++  | +++    |
| TRJO4551.58 | +++     | ++   | +++   | +++    | ZM214M.PL15                   | +    | -    | ++++  | +++    |
| THRO4156.18 | +++     | +    | ++++  | +++    | ZM233M.PB6                    | +++  | +++  | ++    | +++    |
| TRO.11      | ++      | -    | +++   | +++    | ZM249M.PL1                    | +++  | +    | ++++  | +++    |
| WITO4160.33 | ++      | -    | +++   | +++    | SIVmac239 gp140               | -    | -    | -     | ++     |
| YU2         | ++      | -    | ++++  | +++    | SIVmac251.30 gp140            | -    | -    | +     | +++    |
|             |         |      |       |        | H5 HA1                        | -    | -    | -     | +      |

Purified recombinant gp120 (200 ng) was adsorbed onto Reacti-Bind 96-well plates (Pierce), followed by blocking and incubation of serially diluted antibodies. Bound antibody was detected using a horseradish peroxidase-conjugated goat anti-human IgG Fc antibody (Jackson ImmunoResearch Laboratories). Plates were developed using SureBlue 3,3',5,5'-tetramethylbenzidine (Kirkegaard & Perry Laboratories). gp120 proteins were purchased from Immune Technology Corp. or were expressed and purified as described in Supplementary Table 1. Binding was categorized based on the OD<sub>450</sub> value at the highest concentration tested (5 mg/ml for mAbs, 50 mg/ml for HIV-IG) and EC<sub>50</sub> values as follows: '++++' = OD<sub>450</sub> ≥ 3.0 and EC<sub>50</sub> ≤ 0.10; '+++ = OD<sub>450</sub> ≥ 3.0 and EC<sub>50</sub> > 0.10; '++' = 1.0 ≤ OD<sub>450</sub> < 3.0; '+' = 0.2 ≤ OD<sub>450</sub> < 1.0; '-' = OD<sub>450</sub> < 0.2. OD values were rounded to the nearest tenth and EC<sub>50</sub> values to the nearest hundredth before categorization. mAb VRC01 and HIV-IG were included as control antibodies and SIV gp140 proteins and avian influenza hemagglutinin HA1 (H5 HA1) were included as control proteins.

**Supplementary Table 7. Data collection and refinement statistics for V1V2 scaffolds complexed with PG9 Fab**

|                                                      | 1FD6-CAP45/PG9                                | 1FD6-ZM109/PG9        |
|------------------------------------------------------|-----------------------------------------------|-----------------------|
| <b>Data collection</b>                               |                                               |                       |
| Space group                                          | P2 <sub>1</sub> 2 <sub>1</sub> 2 <sub>1</sub> | P2 <sub>1</sub>       |
| Cell dimensions                                      |                                               |                       |
| <i>a</i> , <i>b</i> , <i>c</i> (Å)                   | 73.0, 103.5, 186.4                            | 89.5, 86.6, 94.9      |
| $\alpha$ , $\beta$ , $\gamma$ (°)                    | 90.0, 90.0, 90.0                              | 90.0, 92.1, 90.0      |
| Resolution (Å)                                       | 50.0-2.2 (2.24-2.19)*                         | 50.0-1.8 (1.83-1.80)* |
| <i>R</i> <sub>sym</sub> or <i>R</i> <sub>merge</sub> | 11.2 (33.9)                                   | 6.3 (43.8)            |
| <i>I</i> / $\sigma$ <i>I</i>                         | 8.7 (2.4)                                     | 20.3 (2.0)            |
| Completeness (%)                                     | 92.0 (68.7)                                   | 91.2 (64.8)           |
| Redundancy                                           | 4.1 (2.4)                                     | 3.7 (2.9)             |
| <b>Molecules/ASU</b>                                 | 2                                             | 2                     |
| <b>Refinement</b>                                    |                                               |                       |
| Resolution (Å)                                       | 30.0-2.19                                     | 41.6-1.80             |
| No. reflections                                      | 67,671                                        | 122,322               |
| <i>R</i> <sub>work</sub> / <i>R</i> <sub>free</sub>  | 0.182/0.234                                   | 0.178/0.205           |
| No. atoms                                            | 10,341                                        | 10,152                |
| Protein                                              | 9,507                                         | 9,074                 |
| Ligand/ion                                           | 348                                           | 231                   |
| Water                                                | 487                                           | 847                   |
| <i>B</i> -factors                                    |                                               |                       |
| Protein                                              | 46.0                                          | 45.7                  |
| Ligand/ion                                           | 71.9                                          | 43.3                  |
| Water                                                | 43.4                                          | 42.1                  |
| R.m.s. deviations                                    |                                               |                       |
| Bond lengths (Å)                                     | 0.009                                         | 0.007                 |
| Bond angles (°)                                      | 1.09                                          | 1.07                  |
| <b>PDB ID</b>                                        | 3U4E                                          | 3U2S                  |

\*Values in parentheses are for highest-resolution shell. Each data set was collected from a single crystal.

**Supplementary Table 8. Structural characterization of HIV-1 gp120**

| Structure                                                             | Residues in structure (HXB2 numbering)* | Residues in mature gp120 that remained to be defined crystallographically | Crystallization ligand(s) | Reference                   |
|-----------------------------------------------------------------------|-----------------------------------------|---------------------------------------------------------------------------|---------------------------|-----------------------------|
| HIV-1 gp120 core $\Delta$ C1C5 $\Delta$ V1V2 $\Delta$ V3 strain HXBc2 | 83-127, 195-297, 330-492                | 31-82, 128-194, 298-329, 493-511                                          | CD4 (d1d2), 17b           | Kwong et al., Nature, 1998  |
| HIV-1 gp120 core + V3 $\Delta$ C1C5 $\Delta$ V1V2 strain JR-FL        | 83-127, 195-492                         | 31-82, 128-194, 493-511                                                   | CD4 (d1d2), X5            | Huang et al., Science, 2005 |
| HIV-1 gp120 core + N/C $\Delta$ V1V2 $\Delta$ V3 strain HXBc2         | 31-123, 199-297, 330-511                | 128-194                                                                   | CD4 (d1d2), 48d           | Pancera et al., PNAS, 2010  |
| HIV-1 gp120 V1V2 strains ZM109 and CAP45                              | 126-196                                 | none                                                                      | PG9                       | Current                     |

\*The mature protein is comprised of residues 31-511.

**Supplementary Table 9. Interactions between CAP45 V1V2 scaffold and PG9 Fab**

A. CAP45-Protein : PG9-Protein interactions

|              | <b>Interface Residue</b> | <b>Bond Type</b> | <b>ASA</b> | <b>BSA</b> | <b><math>\Delta_iG</math></b> |
|--------------|--------------------------|------------------|------------|------------|-------------------------------|
| <b>CAP45</b> | CAP45:SER 158            |                  | 31.11      | 3.86       | 0.06                          |
|              | CAP45:ASN 160            |                  | 88.58      | 39.38      | -0.23                         |
|              | CAP45:THR 162            |                  | 65.55      | 6.14       | 0.03                          |
|              | CAP45:THR 163            |                  | 64.39      | 0.37       | -0.00                         |
|              | CAP45:GLU 164            |                  | 82.79      | 0.24       | -0.00                         |
|              | CAP45:LEU 165            |                  | 139.58     | 4.53       | 0.07                          |
|              | CAP45:ARG 166            | H                | 225.48     | 40.18      | 0.01                          |
|              | CAP45:ASP 167            | H                | 106.95     | 34.99      | -0.29                         |
|              | CAP45:LYS 168            | HS               | 117.90     | 78.82      | -0.22                         |
|              | CAP45:LYS 169            | H                | 130.55     | 102.54     | 0.72                          |
|              | CAP45:GLN 170            | H                | 103.11     | 69.70      | -0.05                         |
|              | CAP45:LYS 171            | H                | 153.85     | 90.29      | 0.52                          |
|              | CAP45:ALA 172            |                  | 25.17      | 7.26       | 0.12                          |
|              | CAP45:TYR 173            |                  | 147.52     | 17.94      | 0.29                          |
| <b>PG9</b>   | H:ARG 31                 |                  | 47.00      | 0.29       | -0.01                         |
|              | H:ARG 100B               |                  | 103.55     | 9.77       | -0.14                         |
|              | H:GLY 100D               |                  | 57.64      | 14.72      | -0.17                         |
|              | H:TYR 100E               | H                | 148.93     | 113.74     | 0.87                          |
|              | H:ASN 100F               | H                | 82.37      | 30.92      | -0.22                         |
|              | H:TYR 100G               |                  | 122.49     | 69.66      | 0.59                          |
|              | H:TYR 100H               | H                | 121.32     | 59.02      | -0.20                         |
|              | H:ASP 100I               | H                | 24.40      | 14.01      | -0.07                         |
|              | H:PHE 100J               |                  | 155.15     | 97.54      | 1.52                          |
|              | H:TYR 100K               |                  | 194.18     | 20.13      | 0.08                          |
|              | H:ASP 100L               | HS               | 74.70      | 47.17      | -0.24                         |
|              | H:TYR 100O               |                  | 89.21      | 19.92      | -0.17                         |

**Bond type:** H: Hydrogen, S: Salt bridge

**ASA** Accessible Surface Area, Å<sup>2</sup>

**BSA** BuriedSurfaceArea, Å<sup>2</sup>

**$\Delta_iG$**  Solvation energy effect, kcal/mol

||||Buried area percentage, one bar per 10%

Detailed interface data was calculated on the EBI PISA server ([http://www.ebi.ac.uk/msd-srv/prot\\_int/cgi-bin/piserver](http://www.ebi.ac.uk/msd-srv/prot_int/cgi-bin/piserver))

B. CAP45-Glycan : PG9-Protein interactions

| Interface Residue          | Bond Type | ASA    | BSA    | $\Delta_s G$ |
|----------------------------|-----------|--------|--------|--------------|
| <b>CAP45:NAG 656-PG9:H</b> |           | 361.41 | 36.62  | -1.05        |
| H:GLU 56                   |           | 77.43  | 2.00   | -0.03        |
| H:PHE 100J                 |           | 155.15 | 31.56  | 0.51         |
| <b>CAP45:NAG 657-PG9:H</b> | H         | 362.60 | 122.88 | -2.52        |
| H:ASP 53                   |           | 53.25  | 5.50   | -0.09        |
| H:SER 55                   |           | 76.26  | 37.26  | 0.44         |
| H:PHE 100J                 |           | 155.15 | 24.25  | 0.39         |
| H:TYR 100K                 | H         | 194.18 | 35.17  | 0.17         |
| <b>CAP45:MAN 658-PG9:H</b> |           | 289.03 | 48.25  | -0.81        |
| H:ASP 53                   |           | 53.25  | 0.61   | -0.01        |
| H:GLY 54                   |           | 24.47  | 9.22   | -0.06        |
| H:SER 55                   |           | 76.26  | 27.76  | 0.30         |
| <b>CAP45:MAN 659-PG9:H</b> | H         | 288.45 | 86.97  | -0.91        |
| H:GLY 54                   | H         | 24.47  | 9.57   | -0.11        |
| H:SER 55                   | H         | 76.26  | 11.24  | -0.04        |
| H:GLU 56                   |           | 77.43  | 2.18   | 0.03         |
| H:LYS 57                   | H         | 94.60  | 40.92  | -0.34        |
| H:SER 70                   |           | 40.32  | 0.50   | 0.01         |
| <b>CAP45:MAN 660-PG9:H</b> |           | 288.61 | 10.75  | -0.25        |
| H:TYR 100K                 |           | 194.18 | 11.03  | -0.00        |
| <b>CAP45:MAN 662-PG9:H</b> | H         | 291.08 | 123.55 | -1.79        |
| H:SER 30                   |           | 49.55  | 2.34   | 0.04         |
| H:ASP 53                   |           | 53.25  | 24.81  | 0.10         |
| H:ASN 73                   | H         | 47.36  | 20.56  | 0.03         |
| H:TYR 100K                 |           | 194.18 | 40.78  | 0.55         |

**Bond type:** H: Hydrogen, S: Salt bridge

**ASA** Accessible Surface Area,  $\text{\AA}^2$

**BSA** BuriedSurfaceArea,  $\text{\AA}^2$

**$\Delta_s G$**  Solvation energy effect, kcal/mol

||| Buried area percentage, one bar per 10%

Detailed interface data was calculated on the EBI PISA server ([http://www.ebi.ac.uk/msd-srv/prot\\_int/cgi-bin/piserver](http://www.ebi.ac.uk/msd-srv/prot_int/cgi-bin/piserver))

B. (cont'd) CAP45-Glycan : PG9-Protein interactions

| Interface Residue          | Bond Type | ASA    | BSA    | $\Delta_i G$ |
|----------------------------|-----------|--------|--------|--------------|
| <b>CAP45:NAG 560-PG9:H</b> | H         | 362.10 | 123.39 | -2.04        |
| H:ASP 100                  | H         | 64.98  | 8.99   | -0.07        |
| H:ARG 100B                 | H         | 103.55 | 32.01  | -0.35        |
| H:TYR 100G                 |           | 122.49 | 23.42  | 0.18         |
| H:TYR 100O                 |           | 89.21  | 19.12  | -0.05        |
| <b>CAP45:NAG 561-PG9:H</b> | H         | 362.52 | 91.85  | -2.63        |
| H:ASP 100                  | H         | 64.98  | 25.49  | -0.01        |
| H:ARG 100B                 |           | 103.55 | 12.87  | -0.22        |
| H:TYR 100O                 |           | 89.21  | 26.17  | 0.41         |
| <b>CAP45:MAN 562-PG9:L</b> |           | 286.50 | 8.13   | -0.24        |
| L:TYR 30                   |           | 75.49  | 7.86   | 0.13         |
| <b>CAP45:MAN 564-PG9:H</b> |           | 286.69 | 32.35  | -0.40        |
| H:ASP 100                  |           | 64.98  | 2.91   | 0.00         |
| H:ASN 100P                 |           | 52.24  | 0.98   | -0.01        |
| H:HIS 100R                 |           | 153.38 | 28.66  | 0.20         |
| <b>CAP45:MAN 564-PG9:L</b> |           | 286.69 | 54.34  | -0.73        |
| L:TYR 30                   |           | 75.49  | 22.70  | 0.36         |
| L:GLU 31                   |           | 111.38 | 10.91  | 0.13         |
| L:SER 32                   |           | 39.82  | 7.04   | -0.08        |
| L:LEU 91                   |           | 43.42  | 8.46   | 0.14         |
| <b>CAP45:MAN 565-PG9:H</b> | H         | 284.85 | 76.50  | -0.32        |
| H:ASP 100                  |           | 64.98  | 6.20   | -0.11        |
| H:ASN 100P                 |           | 52.24  | 2.58   | -0.03        |
| H:TYR 100Q                 |           | 100.63 | 22.87  | 0.16         |
| H:HIS 100R                 | H         | 153.38 | 20.14  | -0.00        |
| <b>CAP45:MAN 565-PG9:L</b> | H         | 284.85 | 110.93 | -2.08        |
| L:GLU 31                   |           | 111.38 | 22.00  | 0.29         |
| L:SER 32                   | H         | 39.82  | 12.65  | -0.13        |
| L:ASP 50                   |           | 54.82  | 31.73  | -0.15        |
| L:LYS 53                   | H         | 100.49 | 14.07  | -0.50        |
| <b>CAP45:MAN 566-PG9:H</b> | H         | 289.57 | 97.00  | -1.09        |
| H:TYR 100O                 |           | 89.21  | 24.01  | 0.38         |
| H:ASN 100P                 | H         | 52.24  | 23.54  | -0.24        |
| H:HIS 100R                 | H         | 153.38 | 26.35  | 0.49         |
| <b>CAP45:MAN 566-PG9:L</b> |           | 289.57 | 91.51  | -1.19        |
| L:TYR 30                   |           | 75.49  | 9.88   | 0.08         |
| L:LEU 91                   |           | 43.42  | 17.50  | 0.28         |
| L:THR 92                   |           | 1.09   | 0.49   | -0.01        |
| L:ARG 95                   |           | 202.42 | 44.97  | -0.58        |
| L:ARG 96                   |           | 149.20 | 10.25  | -0.35        |

**Bond type:** H: Hydrogen, S: Salt bridge

**ASA** Accessible Surface Area,  $\text{\AA}^2$

**BSA** BuriedSurfaceArea,  $\text{\AA}^2$

**$\Delta_i G$**  Solvation energy effect, kcal/mol

||| Buried area percentage, one bar per 10%

Detailed interface data was calculated on the EBI PISA server ([http://www.ebi.ac.uk/msd-srv/prot\\_int/cgi-bin/piserver](http://www.ebi.ac.uk/msd-srv/prot_int/cgi-bin/piserver))

**Supplementary Table 10. Interactions between ZM109 V1V2 scaffold and PG9 Fab**

A. ZM109-Protein : PG9-Protein interactions

|              | Interface Residue | Bond Type | ASA    | BSA   | $\Delta_i G$ |
|--------------|-------------------|-----------|--------|-------|--------------|
| <b>ZM109</b> | ZM109:CYS 157     |           | 8.96   | 1.72  | -0.02        |
|              | ZM109:SER 158     |           | 27.85  | 6.02  | 0.10         |
|              | ZM109:ASN 160     |           | 80.18  | 35.40 | -0.17        |
|              | ZM109:THR 162     |           | 14.08  | 2.33  | -0.03        |
|              | ZM109:LYS 166     |           | 140.78 | 11.39 | -0.13        |
|              | ZM109:ASP 167     | H         | 133.11 | 55.17 | 0.14         |
|              | ZM109:ARG 168     | HS        | 150.27 | 99.54 | -0.92        |
|              | ZM109:LYS 169     | H         | 92.29  | 91.51 | 0.19         |
|              | ZM109:GLN 170     |           | 113.66 | 65.25 | -0.09        |
|              | ZM109:LYS 171     | HS        | 141.53 | 91.21 | -0.09        |
|              | ZM109:VAL 172     |           | 45.81  | 0.31  | 0.01         |
|              | ZM109:ASN 173     | H         | 135.28 | 60.34 | 0.20         |
|              | <b>PG9</b>        | H:ARG 31  |        | 42.07 | 1.01         |
| H:ARG 100B   |                   |           | 99.05  | 8.00  | -0.30        |
| H:GLY 100D   |                   |           | 58.60  | 14.18 | -0.16        |
| H:TYR 100E   |                   | H         | 138.43 | 98.50 | 0.85         |
| H:ASN 100F   |                   | H         | 90.98  | 41.07 | -0.28        |
| H:TYR 100G   |                   | H         | 126.29 | 85.17 | 0.38         |
| H:TYR 100H   |                   | H         | 125.91 | 68.59 | 0.06         |
| H:ASP 100I   |                   | HS        | 32.23  | 21.66 | -0.21        |
| H:PHE 100J   |                   |           | 145.90 | 97.54 | 1.54         |
| H:TYR 100K   |                   | H         | 179.08 | 46.70 | -0.06        |
| H:ASP 100L   |                   | HS        | 73.70  | 35.34 | -0.08        |
| H:TYR 100O   |                   |           | 83.78  | 20.22 | -0.13        |

**Bond type:** H: Hydrogen, S: Salt bridge

**ASA** Accessible Surface Area,  $\text{\AA}^2$

**BSA** BuriedSurfaceArea,  $\text{\AA}^2$

**$\Delta_i G$**  Solvation energy effect, kcal/mol

|||Buried area percentage, one bar per 10%

Detailed interface data was calculated on the EBI PISA server ([http://www.ebi.ac.uk/msd-srv/prot\\_int/cgi-bin/piserver](http://www.ebi.ac.uk/msd-srv/prot_int/cgi-bin/piserver))



## B. ZM109-Glycan : PG9-Protein interactions

| Interface Residue          | Bond Type | ASA    | BSA    | $\Delta_i G$ |
|----------------------------|-----------|--------|--------|--------------|
| <b>ZM109:NAG 560-PG9:H</b> | H         | 360.05 | 126.97 | -2.32        |
| H:ASP 100                  | H         | 59.01  | 10.14  | -0.08        |
| H:ARG 100B                 | H         | 99.05  | 26.55  | -0.36        |
| H:TYR 100G                 |           | 126.29 | 23.20  | 0.21         |
| H:TYR 100O                 |           | 83.78  | 19.41  | -0.03        |
| <b>ZM109:NAG 561-PG9:H</b> |           | 361.72 | 86.56  | -2.49        |
| H:ASP 100                  |           | 59.01  | 24.98  | -0.00        |
| H:ARG 100B                 |           | 99.05  | 11.69  | -0.26        |
| H:TYR 100O                 |           | 83.78  | 22.80  | 0.36         |
| <b>ZM109:MAN 562-PG9:L</b> |           | 290.21 | 7.54   | -0.25        |
| L:TYR 30                   |           | 72.56  | 7.14   | 0.11         |
| <b>ZM109:MAN 564-PG9:H</b> |           | 288.35 | 32.43  | -0.41        |
| H:ASP 100                  |           | 59.01  | 1.30   | -0.02        |
| H:ASN 100P                 |           | 57.91  | 1.22   | -0.01        |
| H:HIS 100R                 |           | 153.20 | 30.19  | 0.71         |
| <b>ZM109:MAN 564-PG9:L</b> |           | 288.35 | 49.24  | -0.65        |
| L:TYR 30                   |           | 72.56  | 19.58  | 0.31         |
| L:GLU 31                   |           | 109.49 | 6.31   | 0.06         |
| L:SER 32                   |           | 38.09  | 5.51   | -0.06        |
| L:LEU 91                   |           | 44.38  | 9.41   | 0.15         |
| <b>ZM109:MAN 565-PG9:H</b> | H         | 291.61 | 78.19  | -0.20        |
| H:ASP 100                  |           | 59.01  | 8.70   | -0.15        |
| H:ASN 100P                 |           | 57.91  | 2.82   | -0.03        |
| H:TYR 100Q                 |           | 95.03  | 19.22  | 0.10         |
| H:HIS 100R                 | H         | 153.20 | 21.99  | 0.01         |
| <b>ZM109:MAN 565-PG9:L</b> | H         | 291.61 | 108.26 | -2.20        |
| L:TYR 30                   |           | 72.56  | 0.16   | 0.00         |
| L:GLU 31                   |           | 109.49 | 19.78  | 0.17         |
| L:SER 32                   | H         | 38.09  | 12.62  | -0.09        |
| L:ASP 50                   |           | 49.15  | 28.76  | -0.19        |
| L:LYS 53                   |           | 104.44 | 12.48  | -0.44        |
| <b>ZM109:MAN 566-PG9:H</b> | H         | 292.40 | 100.98 | -1.12        |
| H:TYR 100O                 |           | 83.78  | 21.34  | 0.34         |
| H:ASN 100P                 | H         | 57.91  | 25.01  | -0.26        |
| H:HIS 100R                 | H         | 153.20 | 26.23  | 0.51         |
| <b>ZM109:MAN 566-PG9:L</b> |           | 292.40 | 87.27  | -1.17        |
| L:TYR 30                   |           | 72.56  | 7.27   | 0.10         |
| L:LEU 91                   |           | 44.38  | 17.63  | 0.28         |
| L:ARG 95                   |           | 205.09 | 44.09  | -0.42        |
| L:ARG 96                   |           | 148.86 | 10.56  | -0.37        |
| <b>ZM109:NAG 573-PG9:H</b> | H         | 361.83 | 101.33 | -2.89        |
| H:LYS 52                   |           | 50.77  | 1.71   | -0.06        |
| H:ASP 53                   |           | 53.71  | 5.03   | -0.09        |
| H:SER 55                   |           | 71.82  | 19.19  | 0.24         |
| H:PHE 100J                 |           | 145.90 | 28.94  | 0.46         |
| H:TYR 100K                 | H         | 179.08 | 32.94  | -0.15        |

**Bond type:** H: Hydrogen, S: Salt bridge

**ASA** Accessible Surface Area, Å<sup>2</sup>

**BSA** BuriedSurfaceArea, Å<sup>2</sup>

$\Delta_i G$  Solvation energy effect, kcal/mol

|||| Buried area percentage, one bar per 10%

Detailed interface data was calculated on the EBI PISA server ([http://www.ebi.ac.uk/msd-srv/prot\\_int/cgi-bin/piserver](http://www.ebi.ac.uk/msd-srv/prot_int/cgi-bin/piserver))

**Supplementary Table 11. EC<sub>50</sub> (μg/mL) of PG9 and PG16 binding to V1V2 scaffolds and to associated glycosylation mutants**

| 1FD6 ZM109 scaffold | WT  | N130D | N138D | N160Q | N173D | N189D | N192D |
|---------------------|-----|-------|-------|-------|-------|-------|-------|
| PG9                 | 0.1 | 0.4   | 0.2   | -     | 7.0   | 0.1   | 0.1   |
| PG16                | 3.4 | 1.5   | 4.4   | -     | -     | 4.0   | 2.5   |

“-“ indicates no binding or EC<sub>50</sub>>50μg/mL

| 1FD6 CAP45 scaffold | WT  | N143D | N147D | N156D | N160Q | N192D |
|---------------------|-----|-------|-------|-------|-------|-------|
| PG9                 | 0.2 | 0.1   | 0.1   | 4.9   | -     | 0.2   |
| PG16                | 9.1 | 3.3   | 0.7   | -     | -     | 27.0  |

“-“ indicates no binding or EC<sub>50</sub>>50μg/mL

For 1FD6 CAP45 scaffold, a combination of multiple glycosylation mutants was also tested. N156D/N160Q did not bind PG9 nor PG16. N143D/N147D/N192D bound PG9 with an EC<sub>50</sub> of 0.1 μg/ml and PG16 with an EC<sub>50</sub> of 15.1 μg/ml.

ELISA assay with purified protein:

WT and site mutated 1J08 ZM109 V1V2 proteins produced in 293F cell (10mg/swainsonine) in PBS (pH 7.4) at 2μg/ml were used to coat plates for 2 hours at room temperature (RT). The plates were washed five times with 0.05% Tween 20 in PBS (PBS-T), blocked with 300 μl per well of blocking buffer (5% skim milk and 2% bovine albumin in PBS-T) for 1 hour at RT. 100 μl of each monoclonal antibodies 5-fold serially diluted in blocking buffer were added and incubated for 1 hour at RT. Horseradish peroxidase (HRP)-conjugated goat anti-human IgG (H+L) antibody (Jackson ImmunoResearch Laboratories Inc., West Grove, PA) at 1:5,000 was added for 1 hour at RT. The plates were washed five times with PBS-T and then developed using 3,3',5,5'-tetramethylbenzidine (TMB) (Kirkegaard & Perry Laboratories) at RT for 10 min. The reaction was stopped by the addition of 100μl 1 N H2SO4 to each well. The readout was measured at a wavelength of 450nm. All samples were performed in duplicate.

ELISA assay with supernatant:

Culture supernatants from 293F cell (10mg/L, swainsonine) transfected with WT and site mutated 1FD6 CAP45 V1V2 were used to coat His grab plates (150μL/well) for overnight at 4 °C. 100 μL of each monoclonal antibodies 5-fold serially diluted in blocking buffer were added and incubated for 1 hour at RT. Horseradish peroxidase (HRP)-conjugated goat anti-human IgG (H+L) antibody (Jackson ImmunoResearch Laboratories Inc., West Grove, PA) at 1:5,000 was added for 1 hour at RT. The plates were washed five times with PBS-T and then developed using 3,3',5,5'-tetramethylbenzidine (TMB) (Kirkegaard & Perry Laboratories) at RT for 10 min. The reaction was stopped by the addition of 100μL 1 N H2SO4 to each well. The readout was measured at a wavelength of 450nm. All samples were performed in duplicate.

**Supplementary Table 12. PG9/PG16 heavy chain affinity maturation and CAP45/ZM109 V1V2 recognition\***

| Heavy PG9/16 Germline | Heavy PG9 | Explanation                                                                     | Heavy PG16 (modeled) | Explanation                                              |
|-----------------------|-----------|---------------------------------------------------------------------------------|----------------------|----------------------------------------------------------|
| SER 55                | SER 55    |                                                                                 | MET 55               | MET has larger surface than SER to interact with NAG 573 |
| CDR H3 insertion      | ASP 100   | Contact glycans                                                                 | ILE 100              | ILE might clash with NAG 561                             |
| CDR H3 insertion      | ARG 100B  | Contact glycans/peptide                                                         | HIS 100B             | Contact glycans/peptide                                  |
| CDR H3 insertion      | GLY 100D  | Contact peptide                                                                 | ASP 100D             | Contact peptide                                          |
| CDR H3 insertion      | TYR 100E  | Contact peptide                                                                 | VAL 100E             | Contact peptide – VAL might have weaker interaction      |
| CDR H3 insertion      | ASN 100F  | Contact peptide                                                                 | LYS 100F             | Contact peptide – LYS might disrupt binding              |
| TRP 100K              | TYR 100K  | TYR introduces a hydrogen bond with NAG 573                                     | ASN 100K             | Polar more favorable than hydrophobic                    |
| SER 100L              | ASP 100L  | ASP introduces a hydrogen bond with ARG 168 of V1V2                             | ASP 100L             | Same as PG9                                              |
| TYR or THR 100P       | ASN 100P  | ASN introduces a hydrogen bond with MAN 566                                     | ASN 100P             | Same as PG9                                              |
| TYR 100R              | HIS 100R  | TYR will clash with MAN 566 and HIS introduces a new hydrogen bond with MAN 565 | HIS 100R             | Same as PG9                                              |

\*Residues for which the buried surface area is  $<5\text{\AA}^2$  were not considered. Residues interacting with ZM109 V1V2 or CAP45 V1V2 that are not affinity matured are not listed (these include heavy chain ASP53, TYS 100G, TYS 100H, ASP 100I, PHE 100J, TYR 100O and TYR 100Q).

**Supplementary Table 13. PG9/PG16 light chain affinity maturation on CAP45/ZM109 V1V2 recognition\***

| Light PG9/PG16 Germline | Light PG9 | Explanation                                                        | Light PG16 (Modeled) | Explanation |
|-------------------------|-----------|--------------------------------------------------------------------|----------------------|-------------|
| TYR 30                  | TYR 30    |                                                                    | PHE 30               | Unclear     |
| ASN 31                  | GLU 31    | Interaction is through main chain with MAN 565                     | ASP 31               | Same as PG9 |
| TYR 32                  | SER 32    | TYR will clash with MAN 565 and possible loss of one hydrogen bond | SER 32               | Same as PG9 |
| GLU 50                  | ASP 50    | Both GLU and ASP should interact                                   | ASP 50               | Same as PG9 |
| ASN 53                  | LYS 53    | ASN might lose interaction with MAN 565                            | HIS 53               | Same as PG9 |
| TYR 91                  | LEU 91    | TYR will clash with heavy HIS 100R                                 | LEU 91               | Same as PG9 |
| SER 95                  | ARG 95    | ARG closer to MAN 566                                              | SER 95               |             |
| LEU 96                  | ARG 96    | ARG closer to MAN 566                                              | ARG 96               | Same as PG9 |

\*Residues for which the buried surface area is  $<5\text{\AA}^2$  were not considered.

**Supplementary Table 14. Structural effect of V1V2 mutations on PG9 neutralization**

| Residue    | JR-CSF <sup>1</sup> |                                | ConC <sup>2</sup> |                                | Predicted Structural Effect             |
|------------|---------------------|--------------------------------|-------------------|--------------------------------|-----------------------------------------|
|            | Mutation            | Fold IC <sub>50</sub> Increase | Mutation          | Fold IC <sub>50</sub> Increase |                                         |
| <b>127</b> | <b>V→A</b>          | <b>30</b>                      |                   | <i>NA</i> <sup>3</sup>         | disruption of V1V2 hydrophobic core     |
| 134        | N→A                 | 5                              |                   | <i>NA</i>                      |                                         |
| <b>156</b> | <b>N→A</b>          | <b>280</b>                     |                   | <i>NA</i>                      | glycan-156 removal                      |
| <b>158</b> | <b>S→A</b>          | <b>&gt;2000</b>                | S→A               | 0.9                            | glycan-156 removal                      |
| <b>159</b> | <b>F→A</b>          | <b>&gt;2000</b>                | <b>F→A</b>        | <b>11.2</b>                    | disruption of V1V2 hydrophobic core     |
| <b>160</b> | <b>N→K</b>          | <b>&gt;2000</b>                | <b>N→A</b>        | <b>&gt;1000</b>                | glycan-160 removal                      |
| <b>162</b> | <b>T→A</b>          | <b>&gt;2000</b>                |                   | <i>NA</i>                      | glycan-160 removal                      |
| 165        | I→A                 | 1                              | L→A               | 2                              |                                         |
| 166        | R→A                 | 2                              | R→A               | 0.5                            |                                         |
| 167        | D→A                 | 5                              | D→N               | 0.6                            |                                         |
| 168        | K→A                 | 1                              | K→A               | 0.1                            |                                         |
| <b>169</b> |                     | <i>NA</i> <sup>3</sup>         | <b>K→E</b>        | <b>&gt;1000</b>                | contact site, PG9 TYS 100G proximal     |
| 171        | K→A                 | 1                              | K→A               | 5.9                            |                                         |
| 172        | E→A                 | 1                              |                   | <i>NA</i>                      |                                         |
| <b>173</b> | <b>Y→A</b>          | <b>1400</b>                    |                   | <i>NA</i>                      | destabilization of glycan-156 position  |
| <b>176</b> | <b>F→A</b>          | <b>&gt;5000</b>                |                   | <i>NA</i>                      | disruption of V1V2 hydrophobic core     |
| 177        | Y→A                 | 1                              |                   | <i>NA</i>                      |                                         |
| 179        | L→A                 | 1                              |                   | <i>NA</i>                      |                                         |
| 180        | D→A                 | 1                              |                   | <i>NA</i>                      |                                         |
| <b>181</b> | <b>V→A</b>          | <b>200</b>                     | <b>I→A</b>        | <b>13.2</b>                    | unknown: residue not seen in structures |
| 182        | V→A                 | 1                              |                   | <i>NA</i>                      |                                         |
| 184        | I→A                 | 1                              |                   | <i>NA</i>                      |                                         |
| 185        | D→A                 | 1                              |                   | <i>NA</i>                      |                                         |
| 188        | N→A                 | 3                              |                   | <i>NA</i>                      |                                         |
| 190        | T→A                 | 2                              |                   | <i>NA</i>                      |                                         |

Effect on neutralization of mutants is shown in two contexts, JR-CSF and ConC. Mutations with greater than ten-fold increase in IC<sub>50</sub> values are in bold.

<sup>1</sup>Data obtained from (Walker *et al.*, Science, 2009)

<sup>2</sup>Data obtained from (Moore *et al.*, J. Virol., 2011)

<sup>3</sup>*NA*, Data not available

**Supplementary Table 15. Neutralization activity of PG9, PG16, VRC01, 2F5 and 2G12 against a cross-clade panel of 178 pseudoviruses (IC<sub>50</sub>)**

| Clade | # VS* | % of Total Strains Neutralized |      |       |     |      | % of Strains Neutralized |      |       |     |      |                      |      |       |     |      |
|-------|-------|--------------------------------|------|-------|-----|------|--------------------------|------|-------|-----|------|----------------------|------|-------|-----|------|
|       |       | PG9                            | PG16 | VRC01 | 2F5 | 2G12 | IC50 <1ug/ml             |      |       |     |      | IC50 >1 and <50ug/ml |      |       |     |      |
|       |       |                                |      |       |     |      | PG9                      | PG16 | VRC01 | 2F5 | 2G12 | PG9                  | PG16 | VRC01 | 2F5 | 2G12 |
| A     | 27    | 89                             | 89   | 100   | 85  | 30   | 92                       | 92   | 100   | 26  | 13   | 8                    | 8    | 0     | 74  | 88   |
| AC    | 4     | 100                            | 100  | 50    | 75  | 25   | 100                      | 100  | 100   | 0   | 0    | 0                    | 0    | 0     | 100 | 100  |
| ACD   | 2     | 50                             | 50   | 100   | 100 | 0    | 100                      | 100  | 100   | 50  | 0    | 0                    | 0    | 0     | 50  | 0    |
| AD    | 1     | 100                            | 100  | 100   | 100 | 0    | 0                        | 0    | 100   | 0   | 0    | 100                  | 100  | 0     | 100 | 0    |
| AE    | 16    | 88                             | 81   | 94    | 94  | 0    | 86                       | 92   | 80    | 60  | 0    | 14                   | 8    | 20    | 40  | 0    |
| AG    | 16    | 94                             | 94   | 81    | 69  | 31   | 87                       | 73   | 85    | 0   | 40   | 13                   | 27   | 15    | 100 | 60   |
| B     | 39    | 59                             | 56   | 92    | 82  | 64   | 78                       | 68   | 81    | 31  | 48   | 22                   | 32   | 19    | 69  | 52   |
| BC    | 7     | 100                            | 100  | 100   | 14  | 14   | 71                       | 71   | 86    | 0   | 100  | 29                   | 29   | 14    | 100 | 0    |
| C     | 53    | 81                             | 75   | 85    | 9   | 6    | 84                       | 83   | 80    | 20  | 33   | 16                   | 18   | 20    | 80  | 67   |
| CD    | 3     | 67                             | 67   | 67    | 100 | 33   | 100                      | 100  | 100   | 0   | 0    | 0                    | 0    | 0     | 100 | 100  |
| D     | 9     | 56                             | 22   | 89    | 67  | 44   | 60                       | 50   | 63    | 33  | 25   | 40                   | 50   | 38    | 67  | 75   |
| G     | 1     | 0                              | 0    | 0     | 0   | 0    | 0                        | 0    | 0     | 0   | 0    | 0                    | 0    | 0     | 0   | 0    |
| Total | 178   | 78                             | 74   | 89    | 57  | 27   | 83                       | 81   | 84    | 28  | 38   | 17                   | 19   | 16    | 72  | 63   |

\*VS: Viral strains

Neutralization was measured using single-round-of-infection HIV-1 Env-pseudoviruses and TZM-bl target cells, as described previously (Wu et al., Science, 2010; Li et al., J.Virol., 2005; Seaman et al., J. Virol., 2010). Neutralization curves were fit by nonlinear regression using a 5-parameter hill slope equation as previously described (Li et al., J.Virol., 2005). The 50% and 80% inhibitory concentrations (IC<sub>50</sub> and IC<sub>80</sub>) were reported as the antibody concentrations required to inhibit infection by 50% and 80%, respectively.

Supplementary Table 16. Neutralization activity of mAbs against a cross-clade panel of 178 pseudoviruses (IC<sub>50</sub>)

| Virus ID     | Clade | VRC01 | PG9    | PG16    | 2F5   | 2G12  |
|--------------|-------|-------|--------|---------|-------|-------|
| 0260.v5.c36  | A     | 0.529 | 2.18   | 2.10    | >50   | >50   |
| 0330.v4.c3   | A     | 0.064 | 0.018  | 0.006   | 14.6  | 1.04  |
| 0439.v5.c1   | A     | 0.052 | >50    | >50     | 4.43  | >50   |
| 3415.v1.c1   | A     | 0.092 | 0.149  | 0.036   | 43.9  | 1.32  |
| 3718.v3.c11  | A     | 0.218 | 0.050  | 0.019   | 3.88  | >50   |
| 398-F1_F6_20 | A     | 0.058 | >50    | >50     | 0.280 | 32.2  |
| BB201.B42    | A     | 0.343 | 0.014  | 0.003   | 2.92  | 0.421 |
| BB539.2B13   | A     | 0.094 | 0.106  | 0.012   | 0.136 | >50   |
| BI369.9A     | A     | 0.149 | 0.029  | 0.007   | 0.249 | 1.62  |
| BS208.B1     | A     | 0.029 | 0.031  | 0.004   | 1.10  | >50   |
| KER2008.12   | A     | 0.563 | 0.017  | 0.006   | 6.98  | 10.7  |
| KER2018.11   | A     | 0.070 | 0.001  | <0.0006 | 2.01  | >50   |
| KNH1209.18   | A     | 0.087 | 0.367  | 0.678   | 2.24  | 1.45  |
| MB201.A1     | A     | 0.237 | 0.024  | 0.001   | 0.436 | >50   |
| MB539.2B7    | A     | 0.544 | 0.058  | 0.025   | 2.49  | >50   |
| MI369.A5     | A     | 0.162 | 0.058  | 0.011   | 1.44  | 5.09  |
| MS208.A1     | A     | 0.147 | 0.071  | 0.047   | 1.10  | >50   |
| Q168.a2      | A     | 0.140 | 0.106  | 0.031   | 7.83  | >50   |
| Q23.17       | A     | 0.086 | 0.007  | 0.002   | 10.8  | >50   |
| Q259.17      | A     | 0.051 | 0.045  | 0.028   | 16.1  | >50   |
| Q461.e2      | A     | 0.410 | 3.01   | 4.11    | 13.4  | >50   |
| Q769.d22     | A     | 0.015 | 0.007  | 0.010   | 0.609 | >50   |
| Q769.h5      | A     | 0.014 | 0.002  | 0.002   | >50   | >50   |
| Q842.d12     | A     | 0.006 | 0.005  | 0.001   | >50   | >50   |
| QH209.14M.A2 | A     | 0.024 | >50    | >50     | >50   | >50   |
| RW020.2      | A     | 0.303 | 0.103  | 0.070   | 7.55  | >50   |
| UG037.8      | A     | 0.035 | 0.021  | 0.001   | 0.202 | >50   |
| 3301_V1_C24  | AC    | 0.084 | 0.281  | <0.023  | >50   | >50   |
| 3589_V1_C4   | AC    | 0.073 | 0.025  | 0.728   | 6.99  | 1.68  |
| 6540.v4.c1   | AC    | >50   | 0.035  | 0.017   | 40.0  | >50   |
| 6545_V4_C1   | AC    | >50   | 0.095  | 0.068   | 26.0  | >50   |
| 0815_V3_C3   | ACD   | 0.036 | >50    | >50     | 7.37  | >50   |
| 6095_V1_C10  | ACD   | 0.464 | 0.242  | <0.023  | 0.147 | >50   |
| 3468_V1_C12  | AD    | 0.040 | 2.09   | 2.38    | 3.51  | >50   |
| 620345.c1    | AE    | >50   | 0.393  | >50     | 0.455 | >50   |
| C1080.c3     | AE    | 1.50  | 0.004  | 0.001   | 0.056 | >50   |
| C2101.c1     | AE    | 0.097 | 0.026  | 0.009   | 0.344 | >50   |
| C3347.c11    | AE    | 0.037 | 0.038  | 0.006   | 0.051 | >50   |
| C4118.09     | AE    | 0.110 | 0.037  | 0.021   | 2.49  | >50   |
| CNE3         | AE    | 3.56  | 0.079  | 0.173   | 6.79  | >50   |
| CNE5         | AE    | 0.228 | <0.023 | <0.023  | 9.70  | >50   |
| CNE55        | AE    | 0.292 | 0.146  | 1.37    | 1.49  | >50   |
| CNE56        | AE    | 0.442 | >50    | >50     | 0.974 | >50   |
| CNE59        | AE    | 0.516 | 0.091  | 0.113   | 0.029 | >50   |
| M02138       | AE    | 0.742 | 0.122  | 0.022   | 0.023 | >50   |
| R1166.c1     | AE    | 1.77  | 1.55   | 0.587   | 2.56  | >50   |
| R2184.c4     | AE    | 0.052 | 0.20   | 0.280   | 1.73  | >50   |
| R3265.c6     | AE    | 0.731 | 1.30   | 0.036   | >50   | >50   |
| TH966.8      | AE    | 0.331 | 0.042  | 0.008   | 0.182 | >50   |
| TH976.17     | AE    | 0.066 | >50    | >50     | 0.131 | >50   |

Supplementary Table 16 (cont'd). Neutralization activity of mAbs against a cross-clade panel of 178 pseudoviruses (IC<sub>50</sub>)

| Virus ID  | Clade | VRC01  | PG9     | PG16    | 2F5    | 2G12  |
|-----------|-------|--------|---------|---------|--------|-------|
| 235-47    | AG    | 0.049  | 0.322   | 0.246   | >50    | 0.519 |
| 242-14    | AG    | >50    | 0.025   | <0.023  | 1.06   | >50   |
| 263-8     | AG    | 0.119  | 0.353   | 1.31    | >50    | 6.84  |
| 269-12    | AG    | 0.163  | 1.52    | 0.281   | >50    | >50   |
| 271-11    | AG    | 0.052  | 0.097   | 0.102   | 13.2   | >50   |
| 928-28    | AG    | 0.378  | 0.060   | 0.023   | 1.04   | >50   |
| DJ263.8   | AG    | 0.072  | 0.100   | 0.048   | >50    | 0.721 |
| T250-4    | AG    | >50    | <0.0006 | <0.0006 | 2.93   | 15.6  |
| T251-18   | AG    | 3.58   | >50     | 10.5    | 30.5   | 9.22  |
| T253-11   | AG    | 0.265  | 0.127   | 4.44    | 4.27   | >50   |
| T255-34   | AG    | 0.252  | 0.015   | 0.005   | >50    | >50   |
| T257-31   | AG    | 1.68   | 0.020   | 0.003   | 5.46   | >50   |
| T266-60   | AG    | 0.353  | 24.0    | >50     | 8.04   | >50   |
| T278-50   | AG    | >50    | 0.913   | 1.13    | 4.27   | >50   |
| T280-5    | AG    | 0.017  | 0.379   | 0.233   | 4.30   | >50   |
| T33-7     | AG    | <0.023 | <0.023  | <0.023  | 10.0   | >50   |
| 3988.25   | B     | 2.10   | 0.010   | 0.002   | >50    | 0.251 |
| 5768.04   | B     | 0.099  | 0.073   | 0.020   | 0.139  | 1.44  |
| 6101.10   | B     | 0.104  | >50     | >50     | >50    | >50   |
| 6535.3    | B     | 2.16   | 0.465   | >50     | 4.90   | 3.43  |
| 7165.18   | B     | >50    | >50     | >50     | 1.35   | 0.840 |
| 89.6.DG   | B     | 0.460  | >50     | >50     | 1.514  | 0.528 |
| AC10.29   | B     | 1.43   | 0.078   | <0.023  | 0.975  | >50   |
| ADA.DG    | B     | 0.424  | 0.342   | 0.023   | 0.271  | 9.51  |
| Bal.01    | B     | 0.102  | 0.052   | 8.00    | 4.13   | 0.203 |
| BaL.26    | B     | 0.047  | 0.034   | 0.136   | 3.16   | 0.628 |
| BG1168.01 | B     | 0.449  | >50     | >50     | 1.35   | >50   |
| BL01.DG   | B     | >50    | >50     | >50     | 6.02   | 5.27  |
| BR07.DG   | B     | 1.67   | >50     | >50     | 0.675  | 3.20  |
| BX08_16   | B     | 0.281  | 0.024   | 0.062   | 2.79   | 5.41  |
| CAAN.A2   | B     | 1.06   | 13.0    | 7.43    | 11.6   | >50   |
| HO86.8    | B     | >50    | 0.014   | 0.001   | 0.049  | >50   |
| HT593.1   | B     | 0.438  | 0.271   | 0.153   | 0.172  | 6.83  |
| HXB2.DG   | B     | 0.040  | 0.553   | >50     | 0.040  | 1.01  |
| JRCSF.JB  | B     | 0.234  | 0.003   | 0.002   | 9.45   | 0.857 |
| JRFL.JB   | B     | 0.033  | >50     | >50     | 7.84   | 1.76  |
| MN.3      | B     | 0.033  | >50     | >50     | <0.023 | 0.213 |
| PVO.04    | B     | 0.386  | 6.24    | 19.8    | >50    | 1.50  |
| QH0515.01 | B     | 0.52   | >50     | >50     | 0.3    | 0.039 |
| QH0692.42 | B     | 1.16   | >50     | >50     | 2.22   | 4.05  |
| REJO.67   | B     | 0.045  | 0.005   | 0.005   | 0.300  | >50   |
| RHPA.7    | B     | 0.047  | >50     | 1.32    | 23.2   | >50   |
| SC422.8   | B     | 0.132  | 0.535   | 1.20    | 1.34   | 7.82  |
| SF162.LS  | B     | 0.237  | >50     | >50     | 2.47   | 0.313 |
| SS1196.01 | B     | 0.276  | 0.293   | 0.069   | 25.3   | 17.0  |
| THRO.18   | B     | 4.42   | 15.0    | 0.975   | >50    | >50   |
| TRJO.58   | B     | 0.079  | 0.246   | 0.393   | >50    | >50   |
| TRO.11    | B     | 0.343  | 41.5    | 4.86    | >50    | 0.209 |
| WITO.33   | B     | 0.112  | <0.023  | <0.023  | 2.29   | 0.887 |
| YU2.DG    | B     | 0.055  | 3.69    | 0.041   | >50    | >50   |
| CNE10     | B     | 0.776  | 0.243   | 9.17    | 1.10   | 0.103 |
| CNE12     | B     | 0.785  | >50     | >50     | 5.02   | >50   |
| CNE14     | B     | 0.389  | >50     | >50     | 5.68   | >50   |
| CNE4      | B     | 0.871  | >50     | >50     | 1.77   | >50   |



Supplementary Table 16 (cont'd). Neutralization activity of mAbs against a cross-clade panel of 178 pseudoviruses (IC<sub>50</sub>)

| Virus ID     | Clade | VRC01  | PG9    | PG16   | 2F5   | 2G12  |
|--------------|-------|--------|--------|--------|-------|-------|
| CNE57        | B     | 0.535  | >50    | >50    | 1.09  | >50   |
| CH038.12     | BC    | 0.379  | 0.500  | 49.0   | >50   | 0.031 |
| CH070.1      | BC    | 18.7   | 0.006  | 0.002  | >50   | >50   |
| CH117.4      | BC    | 0.059  | 0.008  | 0.005  | >50   | >50   |
| CH181.12     | BC    | 0.540  | 0.008  | 0.002  | >50   | >50   |
| CNE15        | BC    | 0.080  | <0.023 | <0.023 | >50   | >50   |
| CNE7         | BC    | 0.540  | 1.66   | 0.393  | 1.13  | >50   |
| CNE40        | BC    | 0.425  | 1.16   | 49.0   | >50   | >50   |
| 286.36       | C     | 0.103  | 0.071  | 0.005  | >50   | >50   |
| 288.38       | C     | 1.52   | 3.14   | 0.186  | >50   | 45.9  |
| 0013095-2.11 | C     | 0.142  | <0.023 | <0.023 | >50   | >50   |
| 001428-2.42  | C     | <0.023 | <0.023 | <0.023 | >50   | >50   |
| 0077_V1.C16  | C     | 1.04   | 0.091  | <0.023 | >50   | >50   |
| 00836-2.5    | C     | 0.128  | 49.0   | >50    | >50   | >50   |
| 16055-2.3    | C     | 0.105  | 0.014  | 0.005  | >50   | >50   |
| 16845-2.22   | C     | 2.41   | 2.38   | 27.8   | >50   | >50   |
| 16936-2.21   | C     | 0.109  | >50    | >50    | >50   | >50   |
| 25710-2.43   | C     | 0.545  | 0.038  | <0.023 | >50   | >50   |
| 25711-2.4    | C     | 0.712  | 1.50   | 0.037  | 44.8  | >50   |
| 25925-2.22   | C     | 0.559  | <0.023 | <0.023 | >50   | >50   |
| 26191-2.48   | C     | 0.195  | 0.142  | 1.95   | >50   | >50   |
| 3168.V4.C10  | C     | 0.131  | 0.162  | 0.037  | 23.1  | >50   |
| 3637.V5.C3   | C     | 4.09   | >50    | >50    | >50   | >50   |
| 3873.V1.C24  | C     | 0.954  | >50    | 12.2   | >50   | >50   |
| 6322.V4.C1   | C     | >50    | >50    | >50    | >50   | >50   |
| 6471.V1.C16  | C     | >50    | >50    | >50    | >50   | >50   |
| 6631.V3.C10  | C     | >50    | >50    | >50    | >50   | >50   |
| 6644.V2.C33  | C     | 0.164  | 0.033  | 35.3   | 0.219 | >50   |
| 6785.V5.C14  | C     | 0.332  | <0.023 | <0.023 | >50   | >50   |
| 96ZM651.02   | C     | 0.525  | >50    | >50    | >50   | >50   |
| BR025.9      | C     | 0.271  | 0.044  | 0.009  | >50   | 0.236 |
| CAP210.E8    | C     | >50    | 0.087  | <0.023 | >50   | >50   |
| CAP244.D3    | C     | 0.857  | 0.088  | <0.023 | >50   | >50   |
| CAP45.G3     | C     | 9.47   | <0.023 | <0.023 | >50   | >50   |
| CNE30        | C     | 0.927  | >50    | >50    | >50   | >50   |
| CNE31        | C     | 0.962  | 13.5   | 2.51   | >50   | >50   |
| CNE53        | C     | 0.108  | 0.147  | >50    | >50   | >50   |
| CNE58        | C     | 0.124  | <0.023 | <0.023 | >50   | >50   |
| DU123.06     | C     | 13.6   | 0.091  | <0.023 | >50   | >50   |
| DU151.02     | C     | 7.70   | <0.023 | <0.023 | >50   | >50   |
| DU156.12     | C     | 0.082  | <0.023 | <0.023 | >50   | >50   |
| DU172.17     | C     | >50    | 0.262  | 0.030  | >50   | >50   |
| DU422.01     | C     | >50    | 0.303  | <0.023 | >50   | >50   |
| MW965.26     | C     | 0.038  | 1.99   | 0.961  | >50   | >50   |
| SO18.18      | C     | 0.071  | 0.061  | 0.023  | >50   | >50   |
| TV1.29       | C     | >50    | 0.008  | 0.002  | 3.29  | 13.4  |
| TZA125.17    | C     | >50    | 0.231  | 0.024  | >50   | >50   |
| TZBD.02      | C     | 0.072  | 0.266  | 0.025  | >50   | >50   |
| ZA012.29     | C     | 0.250  | 27.0   | 0.631  | >50   | >50   |
| ZM106.9      | C     | 0.248  | 0.639  | 1.10   | >50   | >50   |
| ZM109.4      | C     | 0.134  | 0.106  | 4.93   | >50   | >50   |
| ZM135.10a    | C     | 1.28   | >50    | >50    | >50   | >50   |
| ZM146.7      | C     | 0.460  | 0.635  | 0.767  | >50   | >50   |
| ZM176.66     | C     | 0.038  | 0.007  | 0.002  | >50   | >50   |

Supplementary Table 16 (cont'd). Neutralization activity of mAbs against a cross-clade panel of 178 pseudoviruses (IC<sub>50</sub>)

| Virus ID         | Clade | VRC01 | PG9    | PG16   | 2F5   | 2G12  |
|------------------|-------|-------|--------|--------|-------|-------|
| ZM197.7          | C     | 0.624 | 0.414  | 0.650  | 35.7  | >50   |
| ZM214.15         | C     | 0.881 | >50    | >50    | >50   | >50   |
| ZM215.8          | C     | 0.276 | <0.023 | >50    | >50   | >50   |
| ZM233.6          | C     | 4.25  | <0.023 | <0.023 | >50   | >50   |
| ZM249.1          | C     | 0.082 | 0.033  | 0.073  | >50   | >50   |
| ZM53.12          | C     | 0.839 | 0.041  | <0.023 | >50   | >50   |
| ZM55.28a         | C     | 0.144 | 0.571  | >50    | >50   | >50   |
| 3326.V4.C3       | CD    | 0.073 | <0.023 | <0.023 | 19.6  | >50   |
| 3337.V2.C6       | CD    | 0.063 | >50    | >50    | 4.63  | >50   |
| 3817.v2.c59      | CD    | >50   | 0.007  | 0.006  | 6.86  | 2.70  |
| 231965.c1        | D     | 0.487 | 1.51   | 4.72   | 18.6  | >50   |
| 247-23           | D     | 24.2  | 0.195  | >50    | 1.95  | >50   |
| 3016.v5.c45      | D     | 0.111 | 0.286  | >50    | 0.765 | >50   |
| 57128.vrc15      | D     | >50   | 0.104  | 0.162  | >50   | 1.72  |
| 6405.v4.c34      | D     | 2.63  | >50    | >50    | 7.51  | 14.8  |
| A03349M1.vrc4a   | D     | 4.66  | >50    | >50    | >50   | >50   |
| NKU3006.ec1      | D     | 0.506 | >50    | >50    | 1.10  | >50   |
| UG021.16         | D     | 0.266 | >50    | >50    | >50   | 2.12  |
| UG024.2          | D     | 0.106 | 3.94   | >50    | 0.029 | 0.162 |
| X2088_c9         | G     | >50   | >50    | >50    | >50   | >50   |
| SIVmac251.30.SG3 | NA    | >50   | >50    | >50    | >50   | >50   |
| SVA.MLV          | NA    | >50   | >50    | >50    | >50   | >50   |

IC<sub>50</sub><1µg/mL are shown in red; 1< IC<sub>50</sub><15µg/mL are shown in yellow;  
15< IC<sub>50</sub><50 µg/mL are shown in green.

Supplementary Table 17. Neutralization activity of mAbs against a cross-clade panel of 178 pseudoviruses (IC<sub>80</sub>)

| Virus ID     | Clade | VRC01 | PG9    | PG16   | 2F5    | 2G12 |
|--------------|-------|-------|--------|--------|--------|------|
| 0260.v5.c36  | A     | 1.48  | 22.8   | >50    | >50    | >50  |
| 0330.v4.c3   | A     | 0.231 | 0.083  | 0.027  | >50    | 13.6 |
| 0439.v5.c1   | A     | 0.236 | >50    | >50    | 48.4   | >50  |
| 3415.v1.c1   | A     | 0.256 | 0.770  | 0.342  | >50    | 5.84 |
| 3718.v3.c11  | A     | 4.99  | 0.202  | 0.102  | 25.7   | >50  |
| 398-F1_F6_20 | A     | 0.320 | >50    | >50    | >50    | >50  |
| BB201.B42    | A     | 1.11  | 0.046  | 0.008  | 20.1   | 3.04 |
| BB539.2B13   | A     | 0.330 | 0.422  | 0.062  | 1.59   | >50  |
| BI369.9A     | A     | 0.657 | 0.151  | 0.037  | 5.57   | 9.75 |
| BS208.B1     | A     | 0.104 | 0.098  | 0.012  | 9.87   | >50  |
| KER2008.12   | A     | 1.74  | 0.085  | 0.046  | 44.4   | >50  |
| KER2018.11   | A     | 0.40  | 0.004  | 0.002  | 19.1   | >50  |
| KNH1209.18   | A     | 0.299 | >50    | >50    | 16.3   | 6.86 |
| MB201.A1     | A     | 0.478 | 0.193  | 0.019  | 5.44   | >50  |
| MB539.2B7    | A     | 1.48  | 0.383  | 0.205  | 18.8   | >50  |
| MI369.A5     | A     | 0.769 | 0.364  | 0.082  | 14.4   | 49.2 |
| MS208.A1     | A     | 0.668 | 0.589  | 31.8   | 4.88   | >50  |
| Q168.a2      | A     | 0.374 | 0.342  | 0.106  | >50    | >50  |
| Q23.17       | A     | 0.252 | 0.020  | 0.004  | 38.6   | >50  |
| Q259.17      | A     | 0.252 | 0.229  | 0.717  | 34.6   | >50  |
| Q461.e2      | A     | 1.31  | 29.9   | >50    | 31.4   | >50  |
| Q769.d22     | A     | 0.074 | 0.033  | 11.0   | 9.52   | >50  |
| Q769.h5      | A     | 0.070 | 0.007  | 0.020  | >50    | >50  |
| Q842.d12     | A     | 0.020 | 0.021  | 0.006  | >50    | >50  |
| QH209.14M.A2 | A     | 0.078 | >50    | >50    | >50    | >50  |
| RW020.2      | A     | 0.868 | 0.622  | 3.51   | 32.1   | >50  |
| UG037.8      | A     | 0.130 | 0.085  | 0.004  | 1.21   | >50  |
| 3301_V1_C24  | AC    | 0.188 | 1.51   | 0.397  | >50    | >50  |
| 3589_V1_C4   | AC    | 0.184 | 0.102  | 37.8   | 27.3   | 9.18 |
| 6540.v4.c1   | AC    | >50   | 0.213  | 0.154  | no fit | >50  |
| 6545_V4_C1   | AC    | >50   | 0.315  | 0.562  | >50    | >50  |
| 0815_V3_C3   | ACD   | 0.074 | >50    | >50    | 27.6   | >50  |
| 6095_V1_C10  | ACD   | 1.50  | 2.25   | 0.443  | 0.660  | >50  |
| 3468_V1_C12  | AD    | 0.121 | >50    | >50    | 14.6   | >50  |
| 620345.c1    | AE    | >50   | >50    | >50    | 7.58   | >50  |
| C1080.c3     | AE    | 9.33  | 0.011  | 0.004  | 2.84   | >50  |
| C2101.c1     | AE    | 0.558 | 0.289  | 0.069  | >50    | >50  |
| C3347.c11    | AE    | 0.198 | 0.168  | 0.031  | 1.20   | >50  |
| C4118.09     | AE    | 0.574 | 0.205  | 0.240  | >50    | >50  |
| CNE3         | AE    | >50   | 1.12   | >50    | 27.8   | >50  |
| CNE5         | AE    | 0.788 | <0.023 | <0.023 | 18.8   | >50  |
| CNE55        | AE    | 0.891 | 1.32   | >50    | 15.5   | >50  |
| CNE56        | AE    | 1.69  | >50    | >50    | 3.82   | >50  |
| CNE59        | AE    | 1.68  | 0.465  | >50    | 0.230  | >50  |
| M02138       | AE    | 1.85  | 1.36   | 0.810  | 0.221  | >50  |
| R1166.c1     | AE    | 7.05  | 9.24   | 12.5   | 20.3   | >50  |
| R2184.c4     | AE    | 0.237 | 1.75   | >50    | 18.1   | >50  |
| R3265.c6     | AE    | 4.28  | 9.80   | 0.691  | >50    | >50  |
| TH966.8      | AE    | 1.24  | 0.183  | 0.030  | 2.66   | >50  |
| TH976.17     | AE    | 0.444 | >50    | >50    | 3.28   | >50  |
| 235-47       | AG    | 0.139 | 1.08   | 3.490  | >50    | 1.64 |
| 242-14       | AG    | >50   | 0.112  | 0.175  | 5.65   | >50  |
| 263-8        | AG    | 0.373 | 1.46   | >50    | >50    | 48.1 |

Supplementary Table 17 (cont'd). Neutralization activity of mAbs against a cross-clade panel of 178 pseudoviruses (IC<sub>80</sub>)

| Virus ID  | Clade | VRC01  | PG9   | PG16   | 2F5   | 2G12  |
|-----------|-------|--------|-------|--------|-------|-------|
| 269-12    | AG    | 0.404  | 5.73  | 1.44   | >50   | >50   |
| 271-11    | AG    | 0.200  | 1.41  | >50    | >50   | >50   |
| 928-28    | AG    | 0.960  | 0.301 | 0.249  | 5.71  | >50   |
| DJ263.8   | AG    | 0.668  | 0.733 | 1.11   | >50   | 4.27  |
| T250-4    | AG    | >50    | 0.001 | 0.001  | 12.5  | >50   |
| T251-18   | AG    | 10.2   | >50   | >50    | >50   | >50   |
| T253-11   | AG    | 0.772  | 1.72  | >50    | 20.1  | >50   |
| T255-34   | AG    | 0.978  | 0.114 | 0.079  | >50   | >50   |
| T257-31   | AG    | 5.80   | 0.075 | 0.021  | 23.6  | >50   |
| T266-60   | AG    | 1.35   | >50   | >50    | 38.5  | >50   |
| T278-50   | AG    | >50    | 6.06  | >50    | 34.3  | >50   |
| T280-5    | AG    | 0.081  | 1.94  | 4.527  | 42.9  | >50   |
| T33-7     | AG    | <0.023 | 0.087 | 0.279  | 40.0  | >50   |
| 3988.25   | B     | >50    | 0.091 | 0.080  | >50   | 1.50  |
| 5768.04   | B     | 0.942  | 1.32  | >50    | 11.9  | 21.0  |
| 6101.10   | B     | 0.330  | >50   | >50    | >50   | >50   |
| 6535.3    | B     | 6.270  | 2.31  | >50    | 28.4  | 37.1  |
| 7165.18   | B     | >50    | >50   | >50    | 25.3  | 4.07  |
| 89.6.DG   | B     | 1.58   | >50   | >50    | 7.23  | 15.4  |
| AC10.29   | B     | 3.83   | 0.306 | 0.088  | 5.01  | >50   |
| ADA.DG    | B     | 1.40   | >50   | 0.458  | 4.18  | >50   |
| Bal.01    | B     | 0.318  | 1.52  | >50    | 33.1  | >50   |
| BaL.26    | B     | 0.154  | 0.365 | >50    | 25.4  | 7.77  |
| BG1168.01 | B     | 1.43   | >50   | >50    | 8.74  | >50   |
| BL01.DG   | B     | >50    | >50   | >50    | 29.0  | >50   |
| BR07.DG   | B     | 4.67   | >50   | >50    | 4.82  | >50   |
| BX08_16   | B     | 0.680  | 0.273 | 38.8   | 13.3  | >50   |
| CAAN.A2   | B     | 2.63   | >50   | >50    | 43.1  | >50   |
| HO86.8    | B     | >50    | 0.125 | 0.020  | 2.33  | >50   |
| HT593.1   | B     | 1.72   | 5.41  | 13.7   | 3.31  | >50   |
| HXB2.DG   | B     | 0.077  | 10.2  | >50    | 0.095 | 2.19  |
| JRCSF.JB  | B     | 0.804  | 0.009 | 0.015  | 42.1  | 5.39  |
| JRFL.JB   | B     | 0.117  | >50   | >50    | 33.6  | 8.50  |
| MN.3      | B     | 0.070  | >50   | >50    | 0.035 | >50   |
| PVO.04    | B     | 0.990  | 37.1  | >50    | >50   | 10.0  |
| QH0515.01 | B     | 3.66   | >50   | >50    | 17.8  | 0.169 |
| QH0692.42 | B     | 3.00   | >50   | >50    | 11.6  | 16.6  |
| REJO.67   | B     | 0.207  | 0.080 | 0.400  | 8.71  | >50   |
| RHPA.7    | B     | 0.155  | >50   | >50    | >50   | >50   |
| SC422.8   | B     | 0.331  | 38.6  | >50    | 7.78  | >50   |
| SF162.LS  | B     | 0.627  | >50   | >50    | 10.5  | 8.64  |
| SS1196.01 | B     | 0.650  | 3.08  | 2.90   | >50   | >50   |
| THRO.18   | B     | 15.1   | >50   | >50    | >50   | >50   |
| TRJO.58   | B     | 0.239  | 3.22  | 13.9   | >50   | >50   |
| TRO.11    | B     | 1.09   | >50   | >50    | >50   | 0.489 |
| WITO.33   | B     | 0.267  | 0.030 | <0.023 | 9.06  | 4.56  |
| YU2.DG    | B     | 0.149  | >50   | >50    | >50   | >50   |
| CNE10     | B     | 1.87   | 1.610 | >50    | 5.04  | 0.339 |
| CNE12     | B     | 2.19   | >50   | >50    | 20.7  | >50   |
| CNE14     | B     | 0.978  | >50   | >50    | 15.8  | >50   |
| CNE4      | B     | 2.36   | >50   | >50    | 10.7  | >50   |
| CNE57     | B     | 1.34   | >50   | >50    | 4.68  | >50   |
| CH038.12  | BC    | 1.53   | >50   | >50    | >50   | 0.155 |
| CH070.1   | BC    | >50    | 0.024 | 0.013  | >50   | >50   |

Supplementary Table 17 (cont'd). Neutralization activity of mAbs against a cross-clade panel of 178 pseudoviruses (IC<sub>80</sub>)

| Virus ID     | Clade | VRC01 | PG9    | PG16   | 2F5   | 2G12 |
|--------------|-------|-------|--------|--------|-------|------|
| CH117.4      | BC    | 0.334 | 0.030  | 0.028  | >50   | >50  |
| CH181.12     | BC    | 1.87  | 0.04   | 0.010  | >50   | >50  |
| CNE15        | BC    | 0.280 | <0.023 | <0.023 | >50   | >50  |
| CNE7         | BC    | 1.36  | 4.50   | 1.91   | 3.45  | >50  |
| CNE40        | B'C   | 4.41  | 20.0   | >50    | >50   | >50  |
| 286.36       | C     | 0.379 | 0.385  | 0.018  | >50   | >50  |
| 288.38       | C     | 5.86  | >50    | >50    | >50   | >50  |
| 0013095-2.11 | C     | 0.319 | 0.061  | 0.149  | >50   | >50  |
| 001428-2.42  | C     | 0.035 | <0.023 | <0.023 | >50   | >50  |
| 0077_V1_C16  | C     | 3.65  | 0.343  | 0.075  | >50   | >50  |
| 00836-2.5    | C     | 0.520 | >50    | >50    | >50   | >50  |
| 16055-2.3    | C     | 0.365 | 0.060  | 0.016  | >50   | >50  |
| 16845-2.22   | C     | 9.07  | 36.8   | >50    | >50   | >50  |
| 16936-2.21   | C     | 0.466 | >50    | >50    | >50   | >50  |
| 25710-2.43   | C     | 1.56  | 0.179  | 0.120  | >50   | >50  |
| 25711-2.4    | C     | 1.70  | 5.27   | 0.573  | >50   | >50  |
| 25925-2.22   | C     | 1.39  | 0.063  | 0.025  | >50   | >50  |
| 26191-2.48   | C     | 0.646 | 0.959  | >50    | >50   | >50  |
| 3168.V4.C10  | C     | 0.279 | 0.657  | 0.515  | >50   | >50  |
| 3637.V5.C3   | C     | 11.0  | >50    | >50    | >50   | >50  |
| 3873.V1.C24  | C     | 0.326 | >50    | >50    | >50   | >50  |
| 6322.V4.C1   | C     | >50   | >50    | >50    | >50   | >50  |
| 6471.V1.C16  | C     | >50   | >50    | >50    | >50   | >50  |
| 6631.V3.C10  | C     | >50   | >50    | >50    | >50   | >50  |
| 6644.V2.C33  | C     | 0.528 | 0.120  | >50    | 0.608 | >50  |
| 6785.V5.C14  | C     | 0.869 | 0.094  | <0.023 | >50   | >50  |
| 96ZM651_02   | C     | 1.94  | >50    | >50    | >50   | >50  |
| BR025.9      | C     | 1.08  | 0.215  | 0.049  | >50   | 1.86 |
| CAP210.E8    | C     | >50   | 0.501  | 0.882  | >50   | >50  |
| CAP244.D3    | C     | 2.36  | 0.362  | 0.058  | >50   | >50  |
| CAP45.G3     | C     | >50   | <0.023 | <0.023 | >50   | >50  |
| CNE30        | C     | 2.59  | >50    | >50    | >50   | >50  |
| CNE31        | C     | 2.24  | >50    | >50    | >50   | >50  |
| CNE53        | C     | 0.280 | 0.809  | >50    | >50   | >50  |
| CNE58        | C     | 0.313 | 0.068  | <0.023 | >50   | >50  |
| DU123.06     | C     | >50   | 0.477  | 0.163  | >50   | >50  |
| DU151.02     | C     | >50   | 0.057  | <0.023 | >50   | >50  |
| DU156.12     | C     | 0.244 | 0.143  | <0.023 | >50   | >50  |
| DU172.17     | C     | >50   | 0.899  | 0.134  | >50   | >50  |
| DU422.01     | C     | >50   | 15.8   | 49.9   | >50   | >50  |
| MW965.26     | C     | 0.116 | 49.9   | >50    | >50   | >50  |
| SO18.18      | C     | 0.166 | 0.227  | 0.136  | >50   | >50  |
| TV1.29       | C     | >50   | 0.044  | 0.150  | 10.9  | >50  |
| TZA125.17    | C     | >50   | 1.21   | 0.719  | >50   | >50  |
| TZBD.02      | C     | 0.228 | 1.30   | 0.175  | >50   | >50  |
| ZA012.29     | C     | 0.828 | >50    | >50    | >50   | >50  |
| ZM106.9      | C     | 0.638 | 6.58   | >50    | >50   | >50  |
| ZM109.4      | C     | 0.394 | 2.64   | >50    | >50   | >50  |
| ZM135.10a    | C     | 6.16  | >50    | >50    | >50   | >50  |
| ZM146.7      | C     | 1.62  | 6.78   | >50    | >50   | >50  |
| ZM176.66     | C     | 0.246 | 0.050  | 0.010  | >50   | >50  |
| ZM197.7      | C     | 1.55  | 1.92   | 6.67   | >50   | >50  |
| ZM214.15     | C     | 3.04  | >50    | >50    | >50   | >50  |
| ZM215.8      | C     | 0.833 | 0.228  | >50    | >50   | >50  |

Supplementary Table 17 (cont'd). Neutralization activity of mAbs against a cross-clade panel of 178 pseudoviruses (IC<sub>80</sub>)

| Virus ID         | Clade | VRC01 | PG9    | PG16   | 2F5   | 2G12  |
|------------------|-------|-------|--------|--------|-------|-------|
| ZM233.6          | C     | 23.1  | <0.023 | <0.023 | >50   | >50   |
| ZM249.1          | C     | 0.242 | 0.408  | 9.23   | >50   | >50   |
| ZM53.12          | C     | 2.84  | 0.170  | 0.103  | >50   | >50   |
| ZM55.28a         | C     | 0.532 | 11.5   | >50    | >50   | >50   |
| 3326_V4_C3       | CD    | 15.2  | 0.111  | 0.221  | >50   | >50   |
| 3337_V2_C6       | CD    | 0.133 | >50    | >50    | 22.2  | >50   |
| 3817.v2.c59      | CD    | >50   | 0.028  | 0.051  | 48.1  | 29.7  |
| 231965.c1        | D     | 1.55  | >50    | >50    | >50   | >50   |
| 247-23           | D     | >50   | 0.909  | >50    | 16.2  | >50   |
| 3016.v5.c45      | D     | 0.341 | >50    | >50    | 12.0  | >50   |
| 57128.vrc15      | D     | >50   | 0.665  | >50    | >50   | 13.4  |
| 6405.v4.c34      | D     | 7.36  | >50    | >50    | 37.0  | >50   |
| A03349M1.vrc4a   | D     | 28.1  | >50    | >50    | >50   | >50   |
| NKU3006.ec1      | D     | 1.78  | >50    | >50    | 26.5  | >50   |
| UG021.16         | D     | 0.970 | >50    | >50    | >50   | >50   |
| UG024.2          | D     | 0.536 | >50    | >50    | 0.681 | 0.574 |
| X2088_c9         | G     | >50   | >50    | >50    | >50   | >50   |
| SIVmac251.30.SG3 | NA    | >50   | >50    | >50    | >50   | >50   |
| SVA.MLV          | NA    | >50   | >50    | >50    | >50   | >50   |

IC<sub>80</sub><1µg/mL are shown in red; 1< IC<sub>80</sub><15µg/mL are shown in yellow;  
15< IC<sub>80</sub><50 µg/mL are shown in green.

**Supplementary Table 18. Data collection and refinement statistics for gp120-T13**

|                                                              | gp120-T13                |
|--------------------------------------------------------------|--------------------------|
| <b>Data collection</b>                                       |                          |
| Space group                                                  | P4 <sub>3</sub>          |
| Cell dimensions                                              |                          |
| <i>a</i> , <i>b</i> , <i>c</i> (Å)                           | 122.42, 122.42, 178.41   |
| <i>α</i> , <i>β</i> , <i>γ</i> (°)                           |                          |
| Resolution (Å)                                               | 50.0 – 6.00 (6.21-6.00)* |
| Mosaicity (°)                                                | 0.6                      |
| I/σI                                                         | 14.4 (2.0)*              |
| Completeness (%)                                             | 99.5 (99.8)*             |
| Redundancy                                                   | 3.8                      |
| <b>Structure solution</b>                                    |                          |
| <b>gp120</b> (PDB ID: 3HI1)                                  |                          |
| Rotation (Euler) <i>α</i> , <i>β</i> , <i>γ</i> (°)          | 147.44, -100.52, 2.34    |
| Translation vector (Å)                                       | 44.20, 62.84, -43.19     |
| <b>Fab</b> (PDB ID: 1HZH)                                    |                          |
| Rotation (Euler) <i>α</i> , <i>β</i> , <i>γ</i> (°)          | 62.81, -60.86, 43.98     |
| Translation vector (Å)                                       | 258.09, 139.37, -93.15   |
| <b>Refinement (rigid body with no positional refinement)</b> |                          |
| Resolution (Å)                                               | 50.0 – 6.00              |
| No. reflections                                              | 6,435 (630)*             |
| R <sub>work</sub> /R <sub>free</sub>                         | 0.31/0.46                |

\*Values in parentheses are for highest-resolution shell.

**Supplementary Table 19. Data collection and refinement statistics for unbound Fabs from V1V2-directed broadly neutralizing antibodies**

|                                                      | PG9 Fab                 | CH04 Fab                                      | CH04H/CH02L Fab                  | CH04H/CH02L Fab                               | PGT145 Fab                       |
|------------------------------------------------------|-------------------------|-----------------------------------------------|----------------------------------|-----------------------------------------------|----------------------------------|
| <b>Data collection</b>                               |                         |                                               |                                  |                                               |                                  |
| Space group                                          | P1                      | P2 <sub>1</sub> 2 <sub>1</sub> 2 <sub>1</sub> | P4 <sub>3</sub> 2 <sub>1</sub> 2 | P2 <sub>1</sub> 2 <sub>1</sub> 2 <sub>1</sub> | P4 <sub>1</sub> 2 <sub>1</sub> 2 |
| Cell dimensions                                      |                         |                                               |                                  |                                               |                                  |
| <i>a</i> , <i>b</i> , <i>c</i> (Å)                   | 71.59, 81.04, 91.70     | 73.36, 74.23, 183.57                          | 86.20, 86.20, 185.68             | 70.61, 105.54, 163.97                         | 118.73, 118.73, 101.18           |
| $\alpha$ , $\beta$ , $\gamma$ (°)                    | 107.2, 90.1, 108.0      | 90, 90, 90                                    | 90, 90, 90                       | 90, 90, 90                                    | 90, 90, 90                       |
| Resolution (Å)                                       | 50.0-3.30 (3.42-3.30) * | 50.0-1.90 (1.93-1.90)*                        | 50.0-2.90 (3.00-2.90)*           | 50.0-2.90 (2.95-2.90)*                        | 50.0-2.30 (2.40-2.30)*           |
| <i>R</i> <sub>sym</sub> or <i>R</i> <sub>merge</sub> | 0.12 (0.35)             | 0.13 (0.50)                                   | 0.14 (0.53)                      | 0.11 (0.55)                                   | 0.09 (0.47)                      |
| <i>I</i> / $\sigma$ <i>I</i>                         | 7.4 (1.9)               | 15.1 (3.0)                                    | 14.2 (2.2)                       | 13.1 (1.8)                                    | 19.1 (4.1)                       |
| Completeness (%)                                     | 89.2 (73.1)             | 99.9 (99.7)                                   | 97.9 (90.4)                      | 82.7 (50.1)                                   | 99.2 (99.9)                      |
| Redundancy                                           | 1.7 (1.5)               | 6.9 (5.0)                                     | 6.8 (3.9)                        | 5.3 (3.5)                                     | 8.4 (8.6)                        |
| <b>Molecules/ASU</b>                                 | 4                       | 2                                             | 1                                | 2                                             | 1                                |
| <b>Refinement</b>                                    |                         |                                               |                                  |                                               |                                  |
| Resolution (Å)                                       | 38.5-3.28               | 39.7-1.90                                     | 30.5-2.89                        | 32.4-2.91                                     | 50.0-2.30                        |
| No. reflections                                      | 24,997                  | 78,886                                        | 15,976                           | 22,836                                        | 32,692                           |
| <i>R</i> <sub>work</sub> / <i>R</i> <sub>free</sub>  | 21.4/24.9               | 19.6/23.8                                     | 22.1/26.8                        | 21.5/24.5                                     | 19.1/22.6                        |
| No. atoms                                            |                         |                                               |                                  |                                               |                                  |
| Protein                                              | 12,824                  | 6,858                                         | 3,398                            | 6,780                                         | 3,491                            |
| Ligand/ion                                           | 30                      | 10                                            | 0                                | 0                                             | 0                                |
| Water                                                | 0                       | 624                                           | 38                               | 22                                            | 353                              |
| <i>B</i> -factors                                    |                         |                                               |                                  |                                               |                                  |
| Protein                                              | 125.0                   | 38.7                                          | 68.9                             | 87.3                                          | 24.3                             |
| Ligand/ion                                           | 162.2                   | 24.1                                          | -                                | -                                             | -                                |
| Water                                                | -                       | 43.1                                          | 51                               | 51                                            | 36.1                             |
| R.m.s. deviations                                    |                         |                                               |                                  |                                               |                                  |
| Bond lengths (Å)                                     | 0.004                   | 0.013                                         | 0.003                            | 0.002                                         | 0.009                            |
| Bond angles (°)                                      | 0.90                    | 1.39                                          | 0.72                             | 0.58                                          | 1.20                             |
| <b>PDB ID</b>                                        | 3U36                    | 3TCL                                          | 3U4B                             | 3U46                                          | 3U1S                             |

\*Values in parentheses are for highest-resolution shell. Each data set was collected from a single crystal.



Supplementary Table 20. CH01-04 crystallization

| Light Chain | Heavy Chain                                          |                 |                                  |                                            |
|-------------|------------------------------------------------------|-----------------|----------------------------------|--------------------------------------------|
|             | CH01 H                                               | CH02 H          | CH03 H                           | CH04 H                                     |
| CH01 L      | Small crystals, not reproducible                     | Low yield (IgG) | Low yield (IgG)                  | No crystals                                |
| CH02 L      | Low yield (IgG)                                      | No crystals     | Low yield (IgG)                  | <b>Two crystal forms, 2.9 Å resolution</b> |
| CH03 L      | Needle like crystals, can reproduce but not optimize | No crystals     | Small crystals, not reproducible | Crystals, not reproducible                 |
| CH04 L      | Not Done                                             | Not Done        | Not Done                         | <b>Crystals, 1.9 Å resolution</b>          |

**Supplementary Table 21. V1V2 and PG9 interface surface areas**

|                                         | CAP45 |      | ZM109 |      |
|-----------------------------------------|-------|------|-------|------|
|                                         | V1V2  | PG9  | V1V2  | PG9  |
| Total surface area ( $\text{\AA}^2$ )   | 1611  | 1376 | 1299  | 1124 |
| Glycan                                  | 69%   | 64%  | 60%   | 52%  |
| <i>B-C</i> hairpin                      | 31%   | 36%  | 40%   | 48%  |
| Strand <i>B</i>                         | 3%    | 7%   | 3%    | 8%   |
| Connecting <i>B-C</i> loop              | 3%    | 5%   | 5%    | 5%   |
| Strand <i>C</i>                         | 25%   | 24%  | 31%   | 27%  |
| Electrostatic ( $\text{\AA}^2$ )        | 141   | 151  | 153   | 89   |
| Sequence-independent ( $\text{\AA}^2$ ) | 348   | 330  | 350   | 321  |

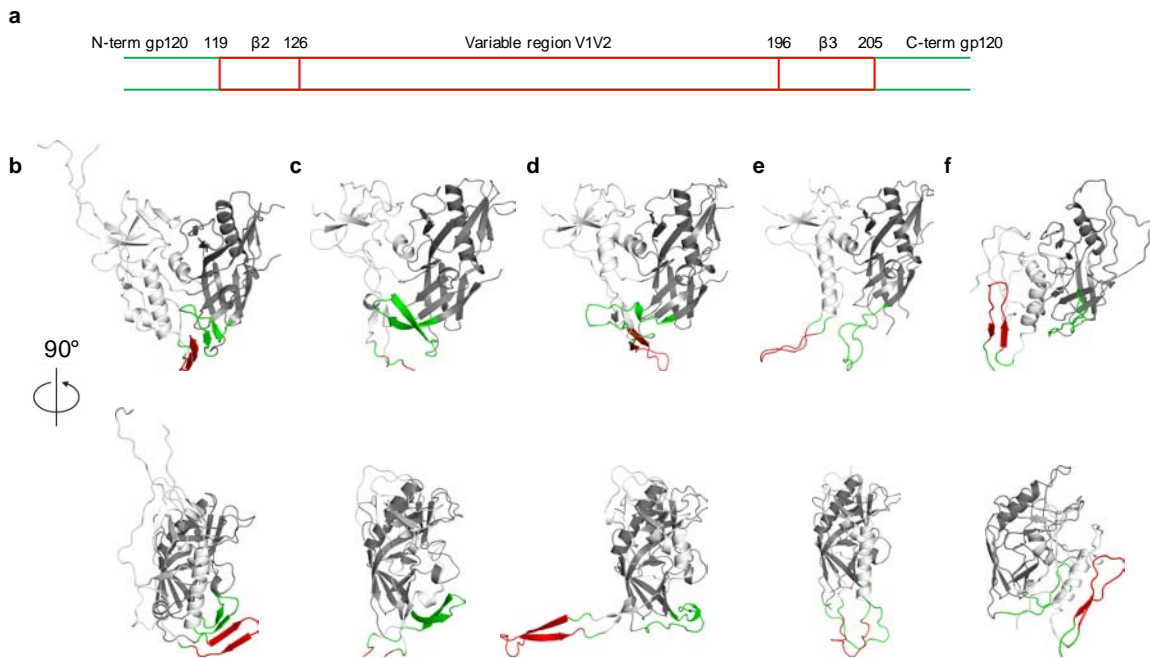

**Supplementary Figure 1. V1V2  $\beta$ -hairpin stubs in previously determined core structures of HIV-1 and SIV.**

V1V2 residues (119-205 in HIV-1 HXB2 numbering and 103-215 in SIV numbering) are highlighted in red; in all cases, residues 128-194 of V1V2 were deleted from the crystallization construct and in some cases, the deletion was more extensive. **a**, Schematic of the bridging sheet and variable region V1V2, with the location of conserved cysteines at residues 119, 126, 196 and 205 highlighted. The V1V2 region has historically been defined as encompassing residues 119-205. Residues 119-127 and residues 195-205 have been defined crystallographically, and these form part of the “bridging sheet” region in the CD4-bound conformation of gp120, with the  $\beta$ 2- and  $\beta$ 3-strands of gp120 defining residues 119-123 and 199-203, respectively. **b**, 48d- and CD4-bound gp120. **c**, b12- bound. **d**, b13-bound. **e**, F105-bound. **f**, unliganded SIV core.

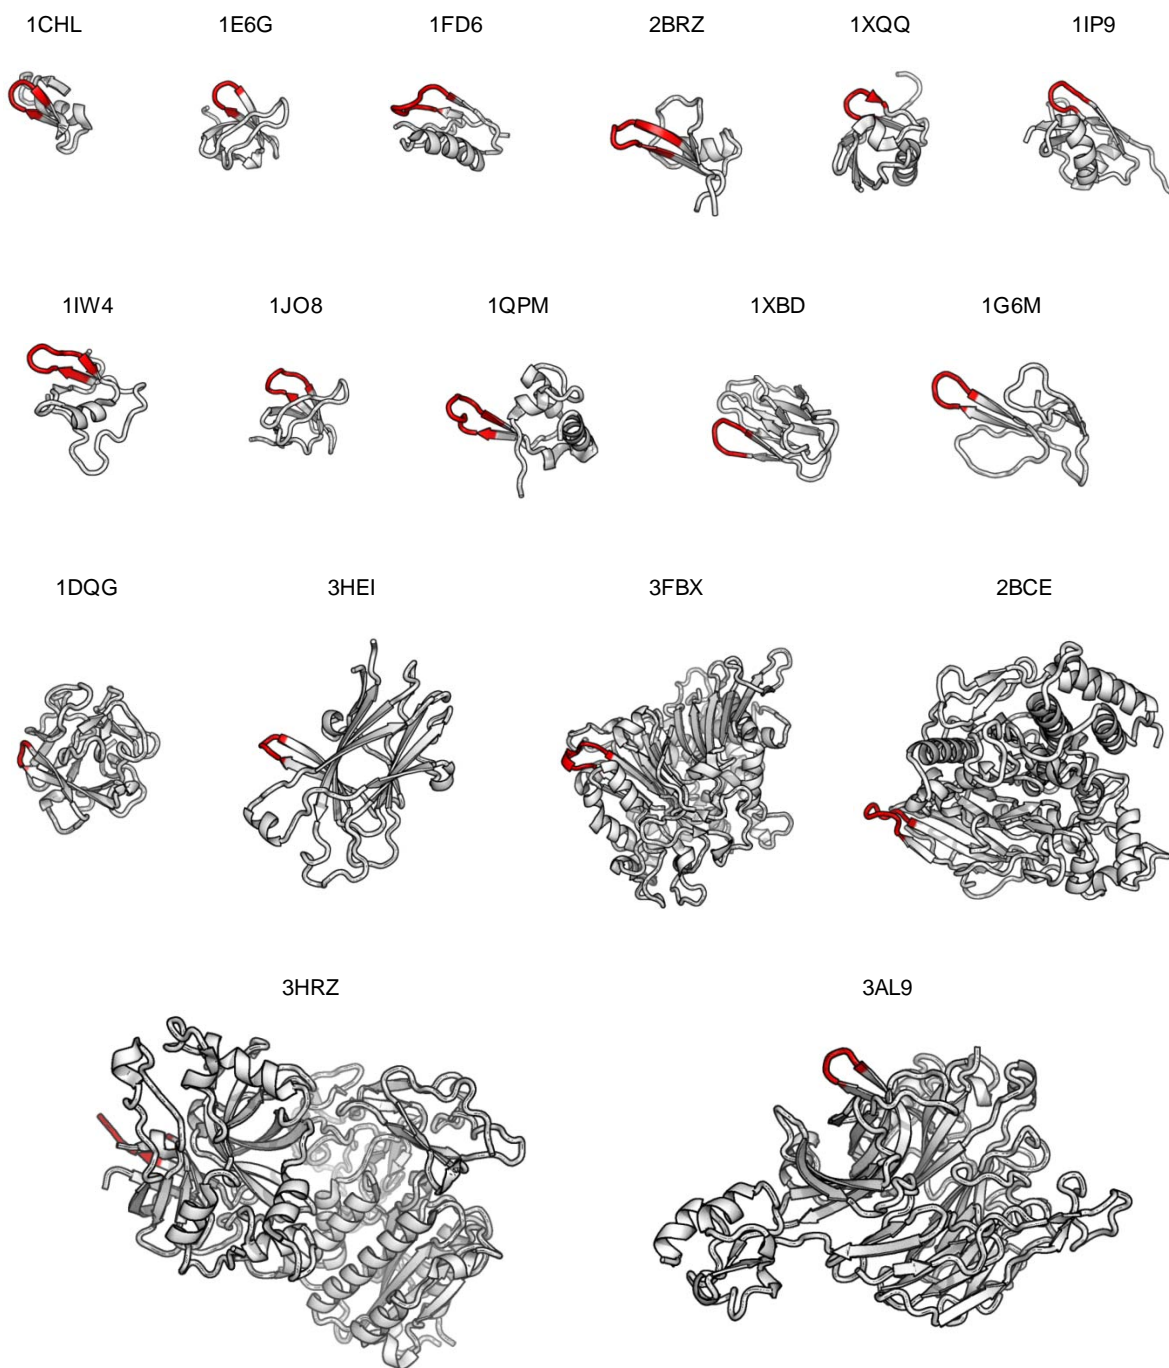

**Supplementary Figure 2. Scaffold proteins used to host V1V2 regions.**

Structures of the scaffold proteins before transplantation of the V1V2 region are shown as grey ribbon diagrams, with their PDB ID codes listed above. The red segment in each scaffold was removed for insertion of the V1V2 region.

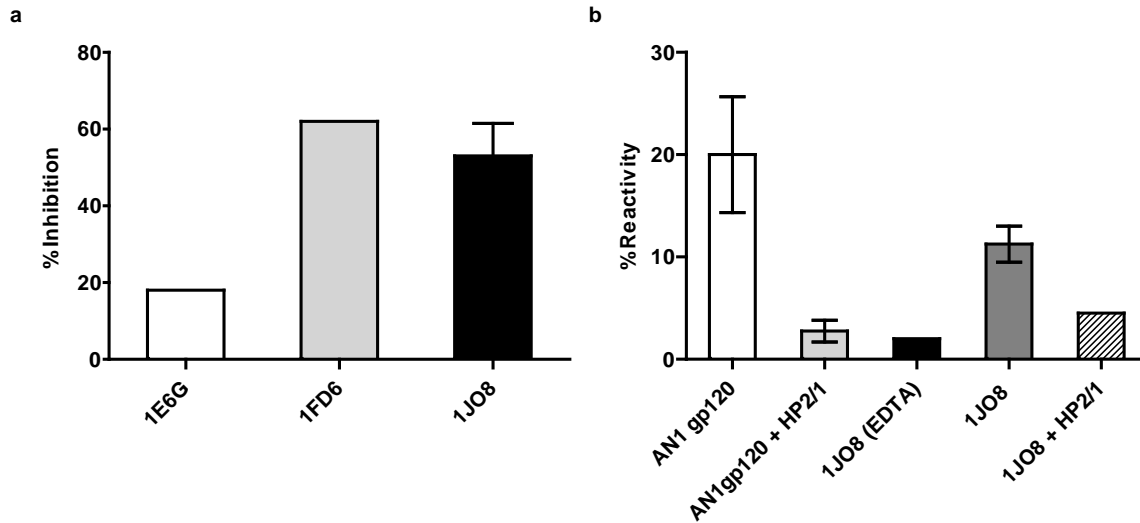

**Supplementary Figure 3. HIV-1 gp120 V1V2 scaffolds interact with gut-homing receptor, integrin  $\alpha_4\beta_7$ .**

YU2 V1V2 scaffold proteins interaction with  $\alpha_4\beta_7$  was studied by an indirect and direct binding assay.

**a**, Indirect binding assay: % inhibition of AN1 gp120 binding to  $\alpha_4\beta_7$  on CD4<sup>+</sup> T cells by three YU2 V1V2 scaffold proteins (1JO8, 1E6G, 1FD6). In the competition assay, purified CD4<sup>+</sup> T cells were preincubated with an anti-CD4 antibody (Leu3A) and YU2 V1V2 scaffold proteins in divalent cation containing buffer (1mM MnCl<sub>2</sub> and 100um CaCl<sub>2</sub>) followed by the addition of biotin labeled ancestral gp120 (AN1 gp120). Mean fluorescence intensity (MFI) was measured to determine the extent of inhibition of AN1 gp120 binding to  $\alpha_4\beta_7$  by the YU2 V1V2 scaffold proteins. This experiment was performed with 5-fold molar excess scaffold proteins over AN1 gp120. This initial competition assay indicated that two of the scaffolds, 1FD6A and 1JO8, provided the most pronounced inhibition of all scaffolds tested, therefore, a direct binding assay was performed with YU2 V1V2 1JO8. **b**, Direct binding assay: % reactivity of YU2 V1V2 1JO8 scaffold protein to  $\alpha_4\beta_7$  on CD4<sup>+</sup> T cells. The scaffold protein was biotinylated and used to bind directly to CD4<sup>+</sup> T cells in the presence of Leu3A and divalent cations (1 mM MnCl<sub>2</sub> and 100  $\mu$ M CaCl<sub>2</sub>). Binding of AN1 gp120 and YU2 V1V2 1JO8 to CD4<sup>+</sup> T cells is reduced to background levels in the presence of HP2/1, an anti  $\alpha_4$  antibody. Separate duplicate experiments were performed for each assay, and SD error bars are shown (except for 1JO8 binding to  $\alpha_4\beta_7$  in EDTA containing buffer and its inhibition by HP2/1). Note that PG9 does not inhibit gp120 (subtype A/E) binding to  $\alpha_4\beta_7$  in our assays.

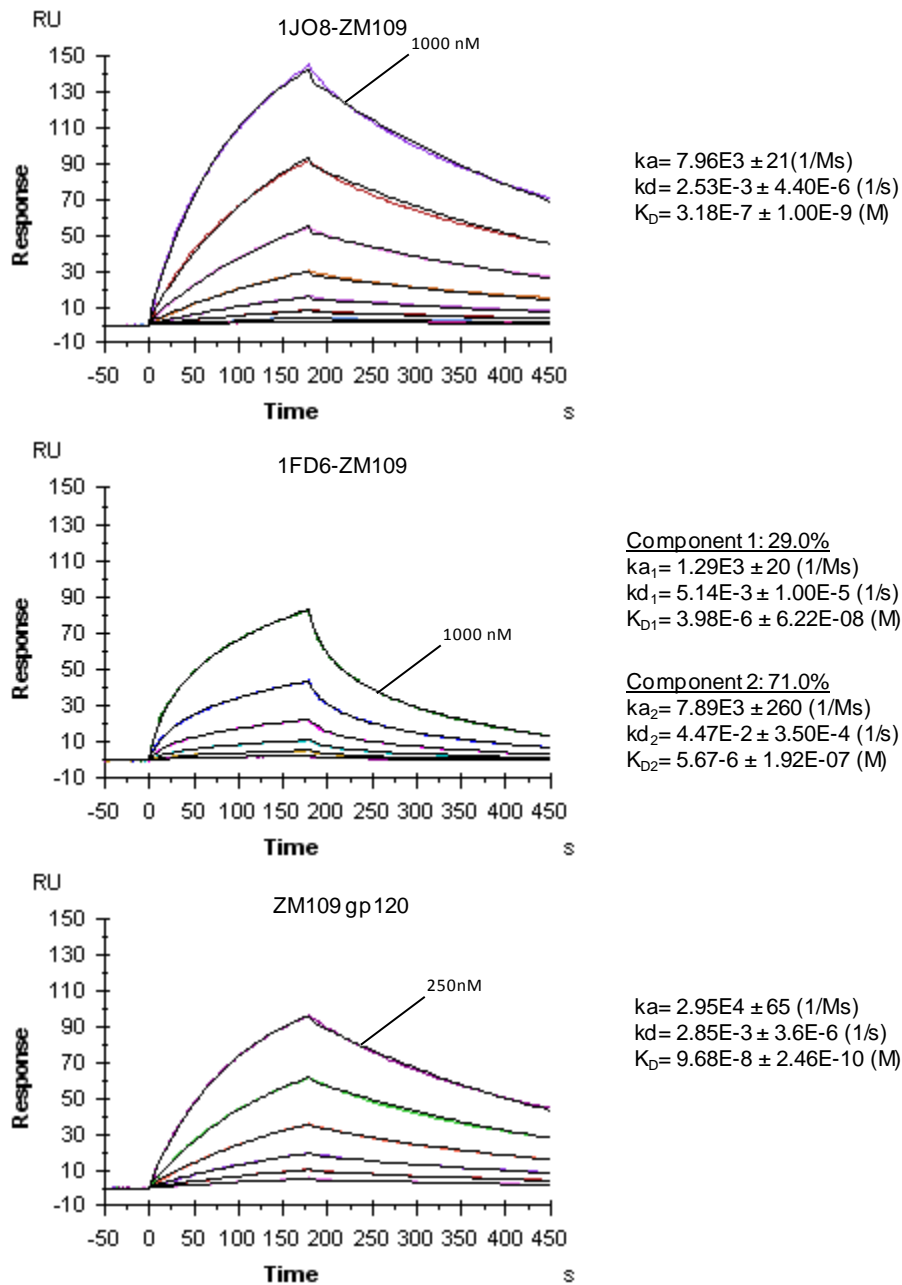

**Supplementary Figure 4. Binding of HIV-1 ZM109 gp120 and V1V2 scaffolds to antibody PG9.**

Surface-plasmon resonance sensorgrams with their respective fitted curves (black) are shown, with the highest concentration of each 2-fold dilution series labeled. The association and dissociation rates as well as the affinity values are shown to the right of the sensorgrams. In curves fitted with a heterogenous model, separate kinetics data are listed, along with contributing percentages for each component. Data were processed as described in Methods.

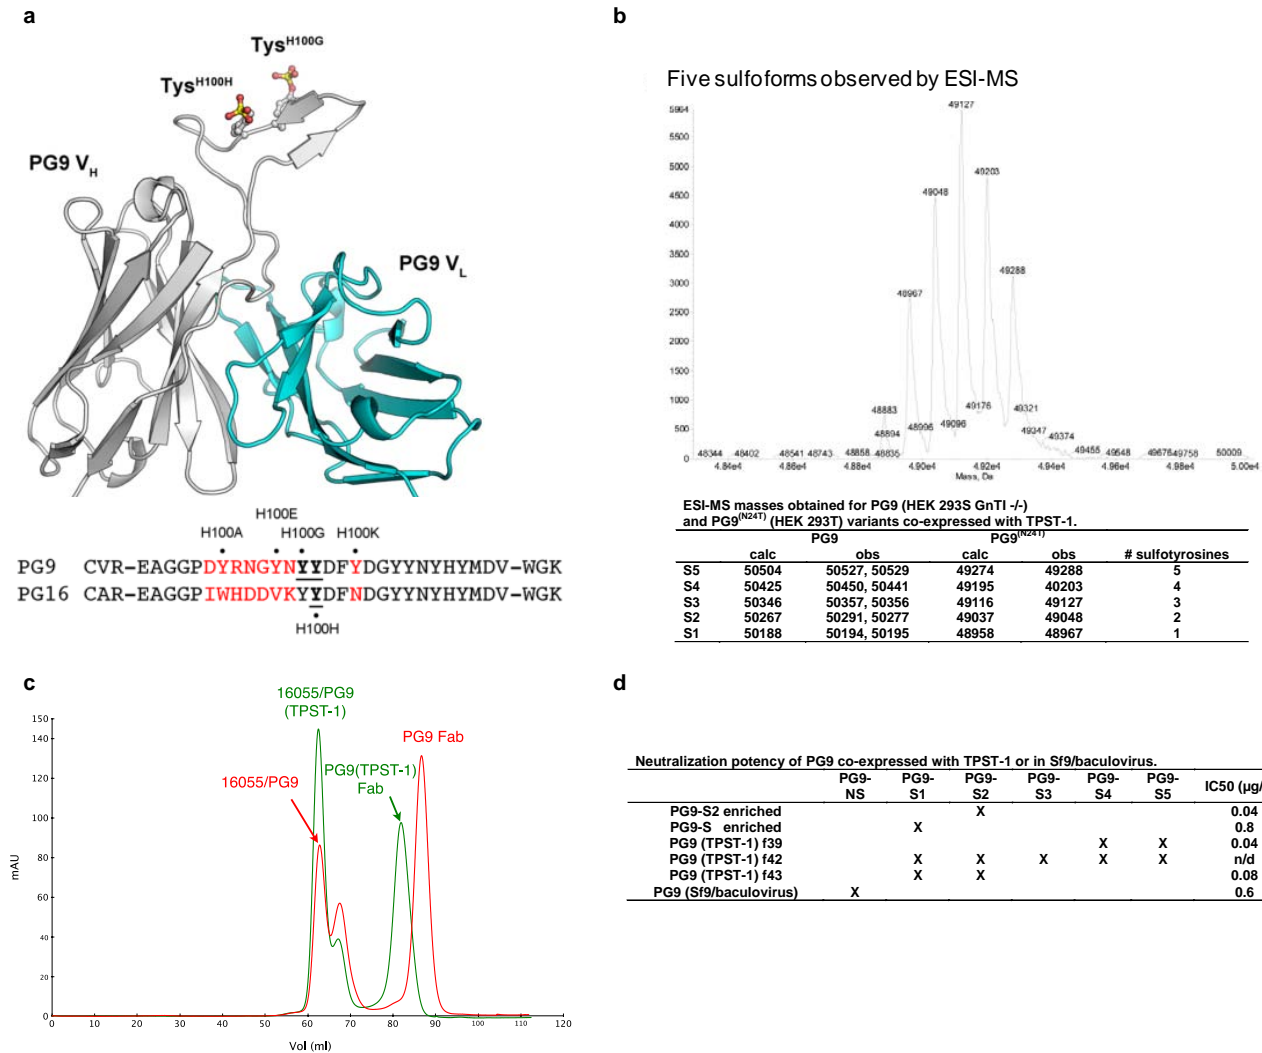

### Supplementary Figure 5. PG9 tyrosine sulfate (TYS) characterization.

**a**, PG9 Fab has two sulfated tyrosines although there is some heterogeneity. **b**, Sulfation is controlled by tyrosyl protein sulfotransferase (TPST) and co-expression of TPST-1 promotes hypersulfation of PG9 (up to quintuple). Hypersulfated PG9 Fab was produced by co-expression of human tyrosyl protein sulfotransferase (TPST-1) in HEK 293T. Hypersulfated PG9 Fab was produced in Sf9 cells using a recombinant baculovirus, pFastBac Dual, expressing both the heavy and light chains under the control of the polyhedron and p10 promoters, respectively. Fabs were purified by anti-lambda affinity (CaptureSelect, BAC) and cation exchange using Mono S (GE HealthCare). Fractionation of PG9 sulfoforms was achieved by a shallow KCl gradient and individual fractions were characterized by electrospray time-of-flight mass spectrometry (ESI-TOF). **c**, Sulfation enhances PG9 association with gp120. Hypersulfated PG9 Fab (green, co-expressed with TPST-1) shows higher affinity for monomer than not hypersulfated PG9 Fab (red), however PG9 binary complex does not completely survive SEC. **d**, Effect of neutralization of hyper-sulfated PG9. Tyrosine to phenylalanine CDR H3 mutants (H100A, H100E, H100G, H100H, and H100K) were generated by the polymerase incomplete primer extension method (PIPE), expressed, purified, and fractionated as for wild-type.

**a**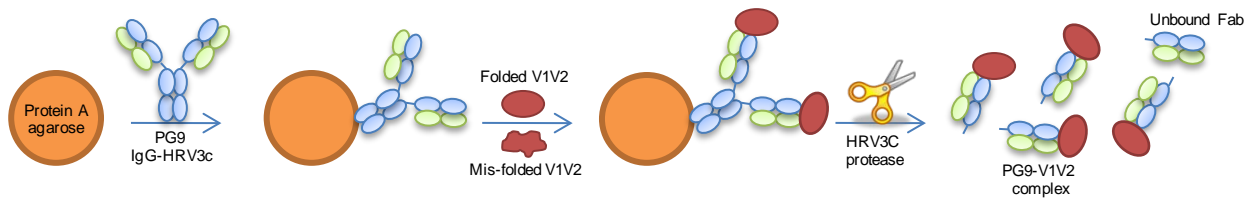**b**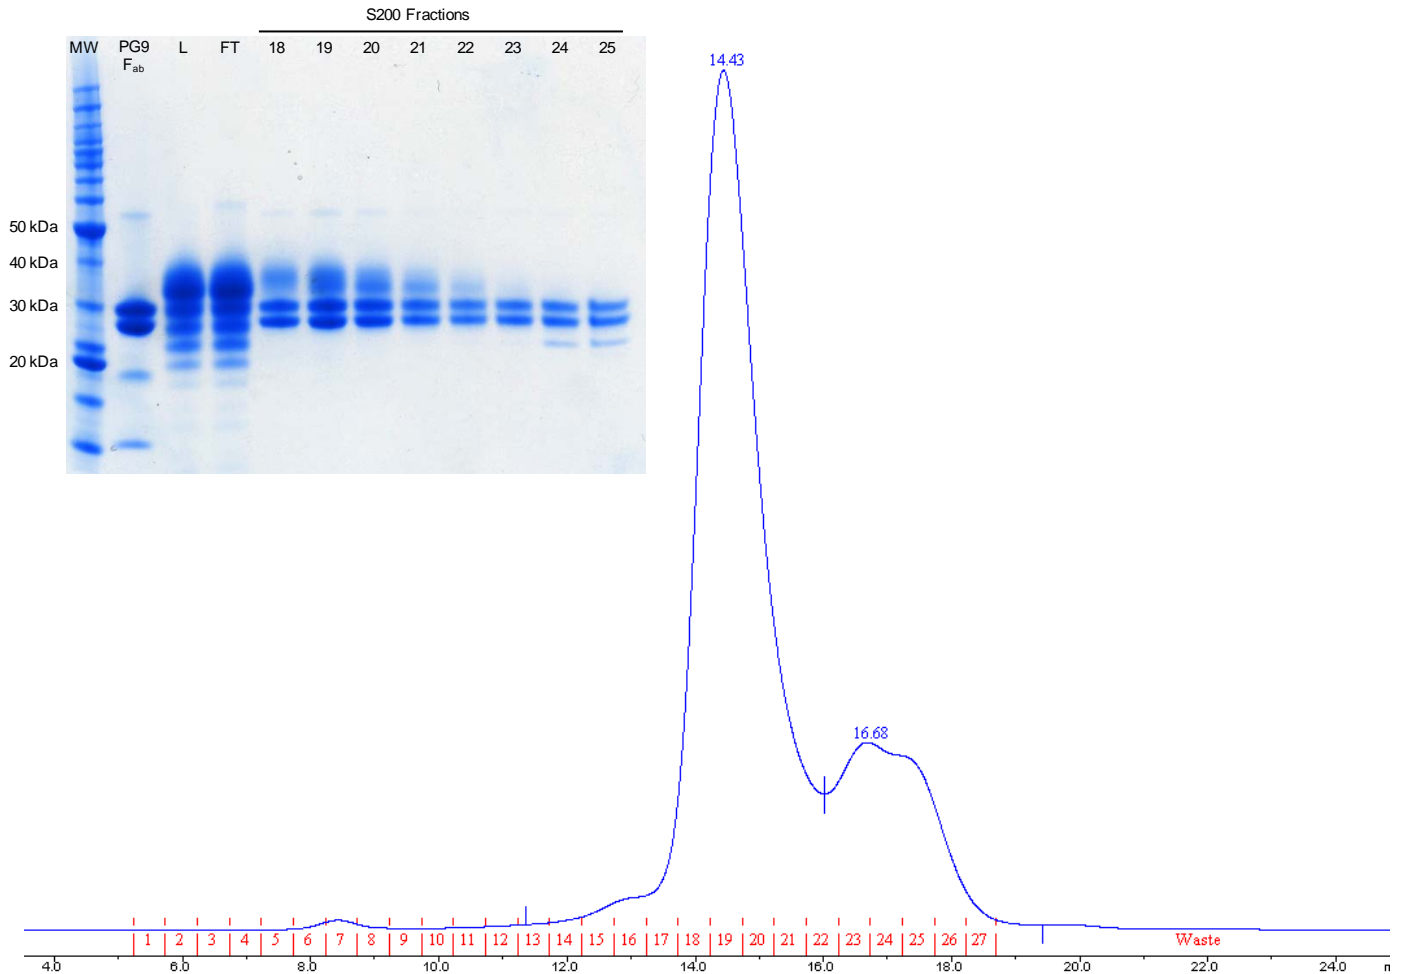

### Supplementary Figure 6. On-column complex formation and purification.

**a**, Schematic of the on-column complex formation between PG9 and scaffolded V1V2s, as described in Methods. **b**, Gel filtration result of the elution shown in (a) for 1J08 ZM109. A coomassie blue-stained SDS-PAGE gel is shown for fractions 18-25. MW=molecular weight standards. L=purified 1J08 ZM109 before passage over the PG9-bound resin. FT=flow through of purified 1J08 ZM109 after passage over the PG9-bound resin.



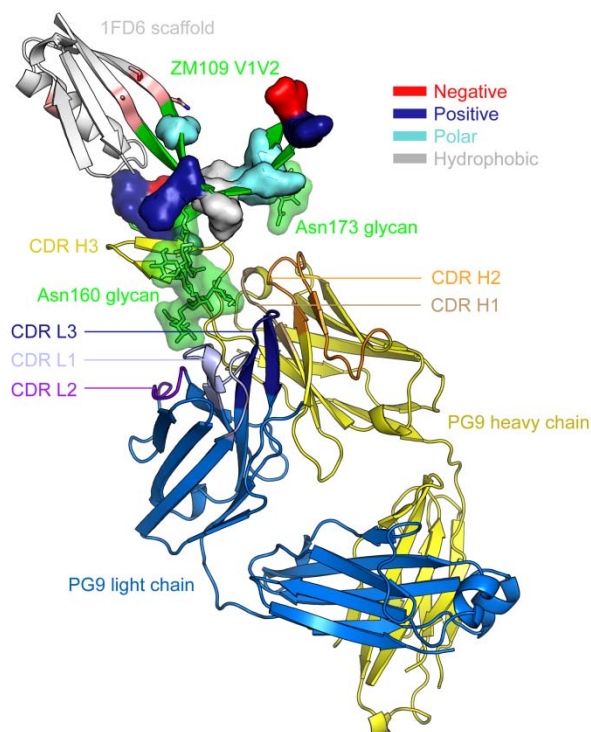

**Supplementary Figure 7. Structure of PG9 in complex with the V1V2 region from HIV-1 strain ZM109.** The PG9 heavy and light chains are shown as yellow and blue ribbons, respectively, with CDRs colored different shades. V1V2 residues 126-196 from HIV-1 strain ZM109 are shown as green ribbons, and attached glycans are shown as sticks with a transparent molecular surface. Residues that are different from the CAP45 strain (main text Fig 1) are shown as opaque molecular surfaces, colored according to chemical properties (red: negatively charged; blue: positively charged; cyan: polar; grey: hydrophobic). The 1FD6 scaffold is shown as white ribbons, with side chains shown as sticks and colored pink for those residues that were altered during the scaffolding process, including a Glu to Ala mutation that ablated IgG binding.

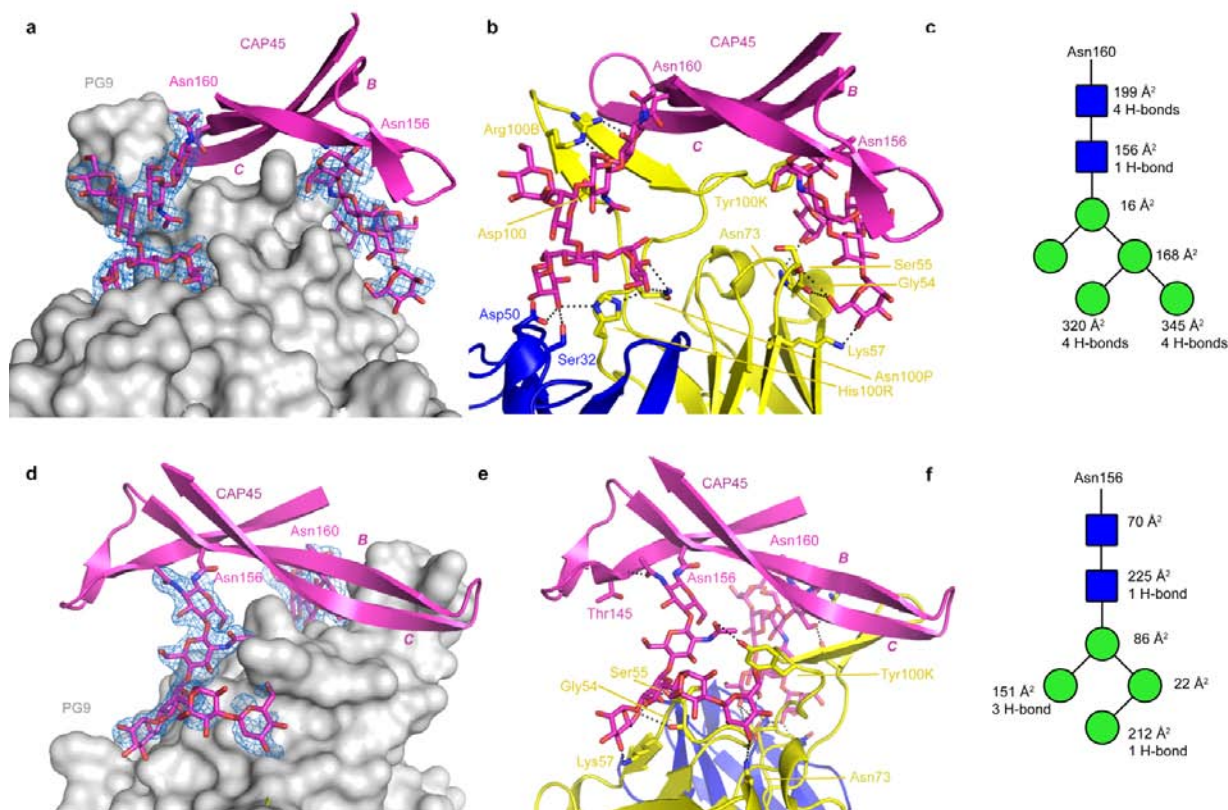

### Supplementary Figure 8. Glycan recognition of CAP45 V1V2 by PG9.

PG9 recognizes the  $\text{Man}_5\text{GlcNac}_2$  glycan attached to Asn160 of CAP45 V1V2 through interactions analogous to those observed for ZM109. Additionally, the CAP45 V1V2 structure also reveals several interactions between PG9 and the Asn156-glycan. **a**, PG9 is represented as a grey molecular surface, and CAP45 V1V2 is shown as a ribbon diagram (magenta). Mannose and GlcNac residues are shown as sticks, as are the side-chains of Asn160 and Asn156.  $2F_o - F_c$  electron density contoured at  $1\sigma$  is shown as a blue mesh. **b**, Ribbon representations of CAP45 V1V2 (magenta), PG9 heavy chain (yellow) and PG9 light chain (blue). Glycans and PG9 residues hydrogen-bonding to the glycans are shown as sticks. Nitrogen atoms are colored blue, oxygen atoms are colored red, and black dotted lines represent hydrogen bonds. **c**, Schematic of the  $\text{Man}_5\text{GlcNac}_2$  moiety attached to Asn160. GlcNac is shown as blue squares, and mannose is shown as green circles. Hydrogen bonds to PG9 are listed to the right of the symbols, as is the total surface area buried at the interface between PG9 and each sugar. **d**, **e**, **f**, An orientation of the structure highlighting the interactions between PG9 and the Asn156-glycan of CAP45 V1V2 is presented in the lower three panels with representations corresponding to panels **a**, **b**, **c**, respectively.

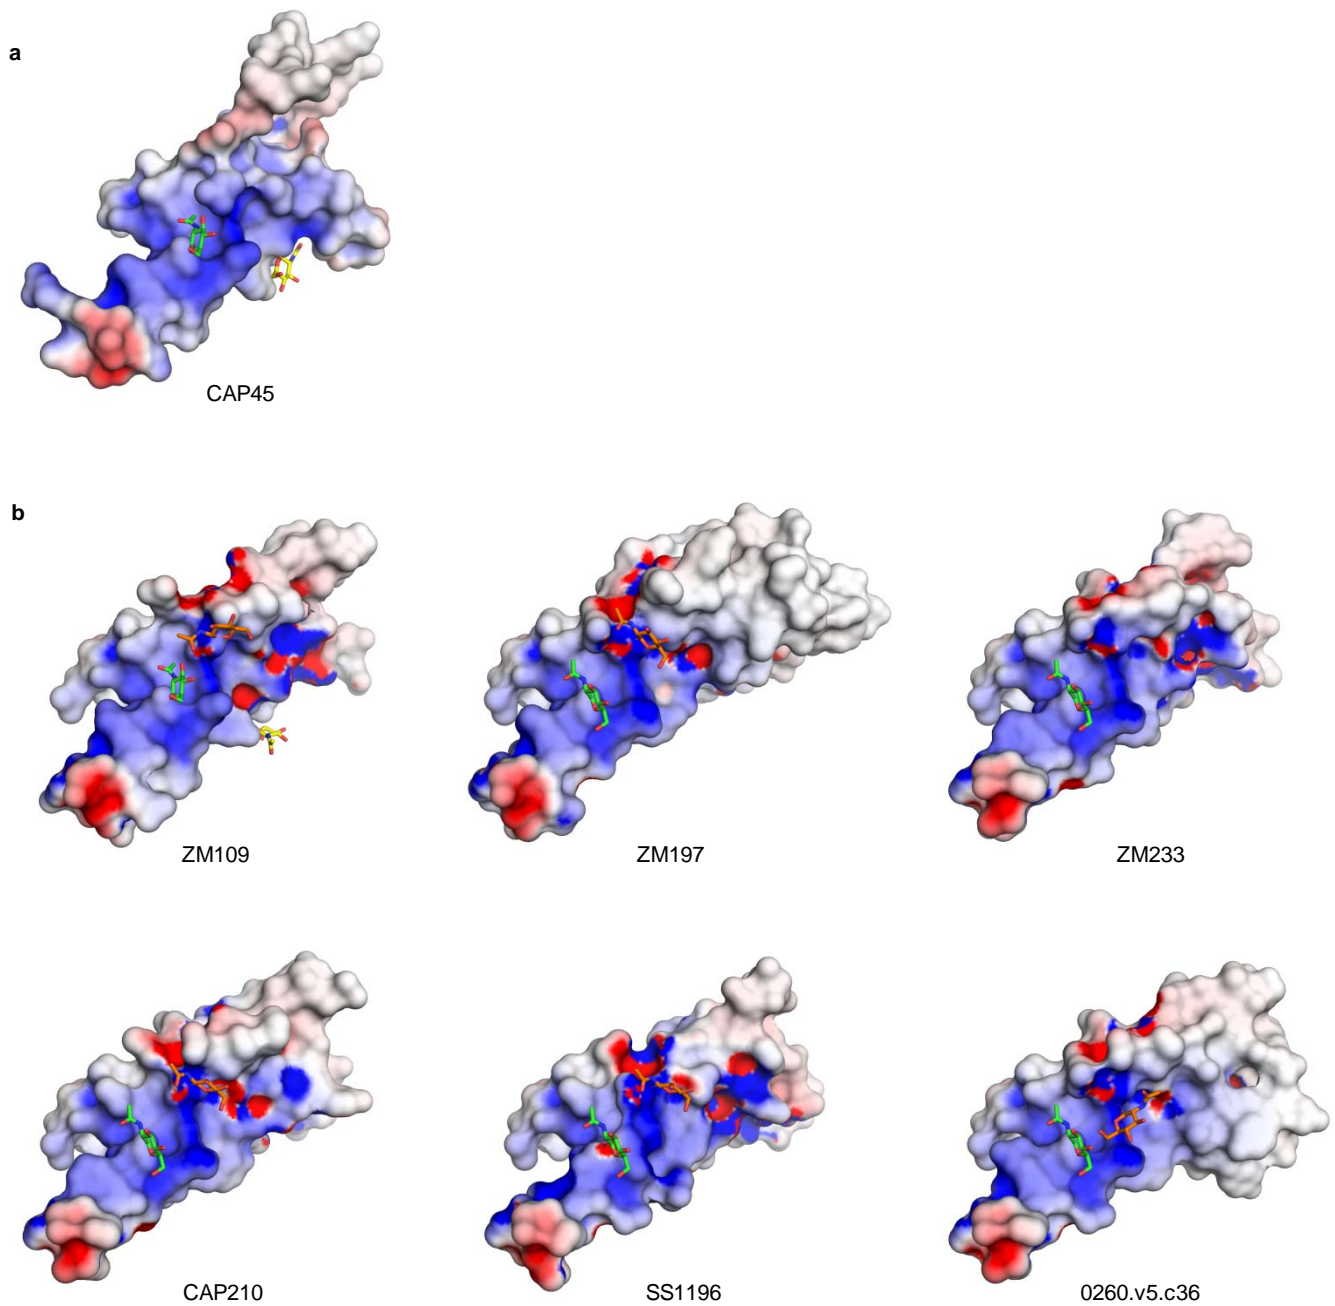

**Supplementary Figure 9. HIV-1 strains with V1V2 regions lacking an *N*-linked glycan at position 156.** Electrostatic surface potentials of V1V2, with modeled V1 and V2 loops. **a**, CAP45. **b**, ZM109 along with models of five additional strains lacking glycan 156. Coloring scale is blue to red, corresponding to positive and negative surface potentials, respectively. Potential glycosylation sites are shown for glycans 160 (green), 156/173 (yellow) and other glycosylation sites within strands *A-D* (orange). Glycans for the modeled V1 and V2 loops are not shown.

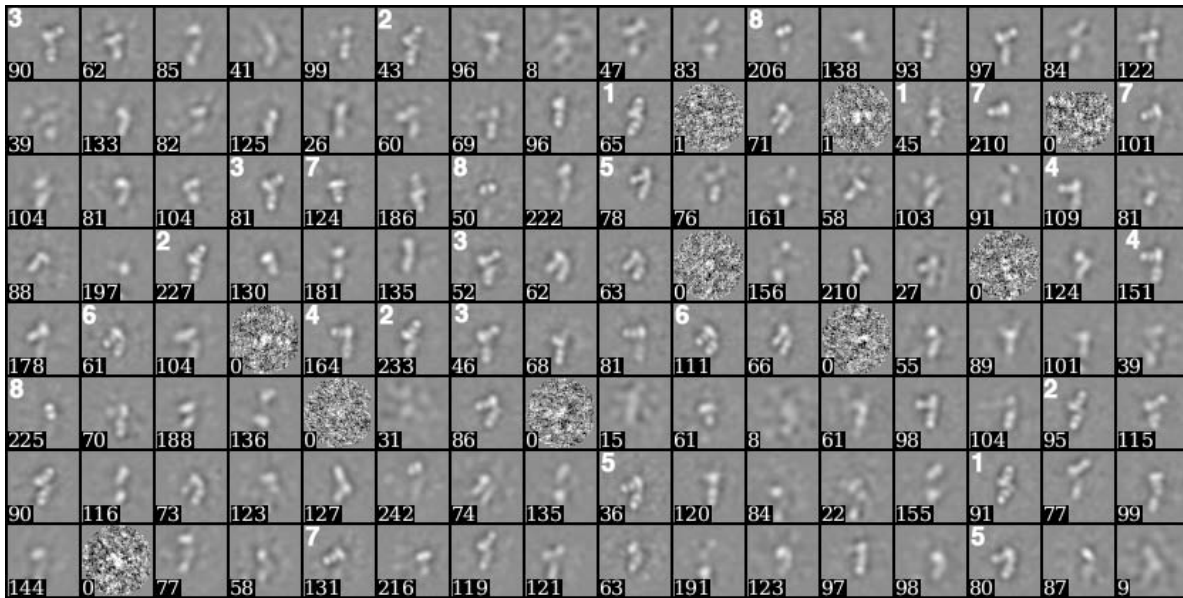

**Supplementary Figure 10. Negative-stained reference-free 2D-class averages of the 128 classes calculated from untilted micrographs collected for the random conical tilt (RCT).**

Class averages with white numbers in the top left were used to generate the RCT volumes. The white numbers represent the RCT volumes shown in Fig. 4b. Numbers in the lower left represent the total number of particles in each average. Reference free hierarchical class averaging within each class average produced indistinguishable results to the parent class average. An RCT volume was calculated from the appropriately combined class averages shown in this figure. RCTs were only calculated from class averages where the hole in the center of the T13 and PG9 Fabs were clearly visible. This hole in the center of the Fabs was used as a biophysical restraint to support the authenticity of the class averages.

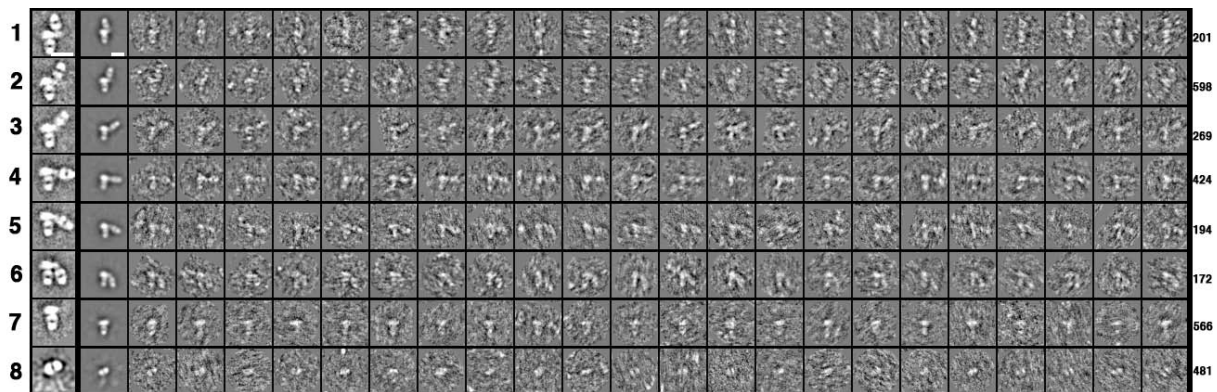

**Supplementary Figure 11. Negative-stained reference-free 2D-class averages compared to raw particles.**

First column entries represent the RCT volume designation shown in Fig. 4b. Second column entries are reference free class averages determined from the untilted micrographs collected at a 150,000x magnification. Classes 7 and 8 are the binary complex of T13 in complex with gp120, and the PG9 Fab, respectively. Third column entries are the reference free class averages determined from the untilted micrographs collected at 62,000x for the RCT image reconstruction. The scale bar in each column is 100Å long. Columns 4-25 are representative raw particles for each class average at the 62,000x magnification. The particles are extracted from CTF corrected images. The final column depicts the total number of particles in each class. A total of 11,997 particles were extracted from the untilted micrographs collected at a 62,000x magnification.



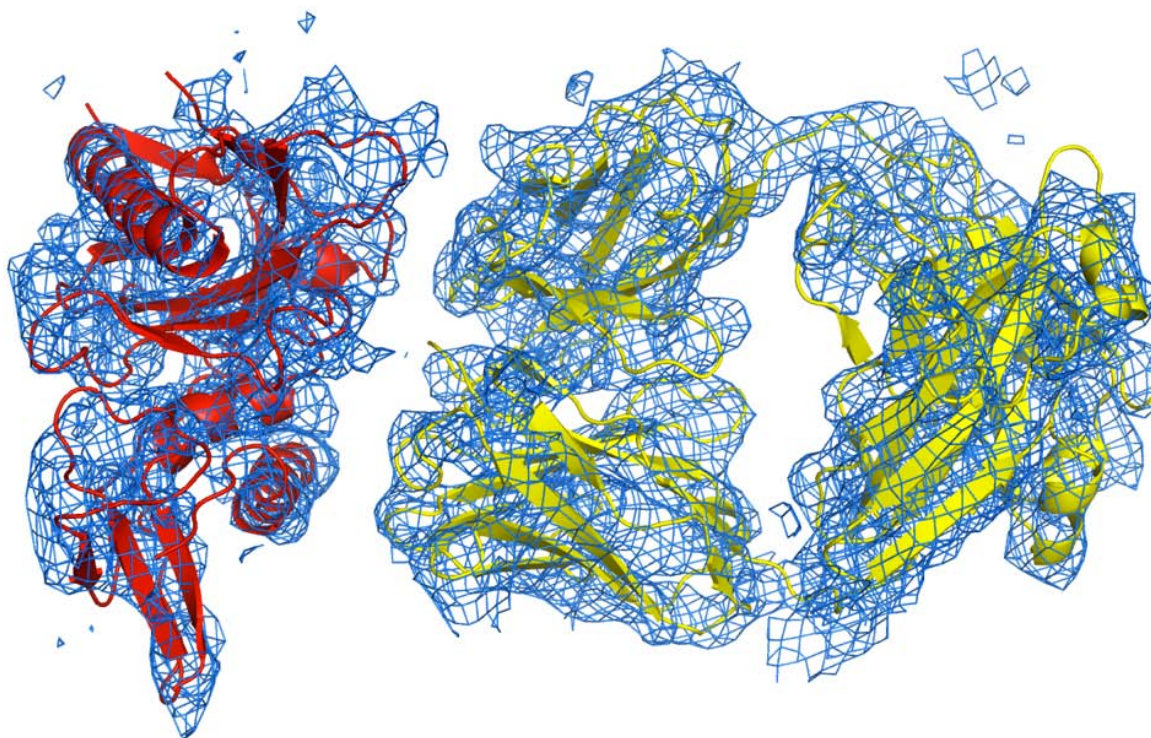

**Supplementary Figure 12. 6Å crystal structure of JR-FL gp120 core bound to T13 Fab.**

Ribbon representation of JR-FL gp120 core (red) in complex with T13 Fab (yellow) at 6Å with  $2F_o-F_c$  electron density shown in blue mesh. JR-FL gp120 core was expressed in HEK 293S GnTI<sup>-/-</sup> cells using a codon-optimized synthetic gene incorporating an Ig kappa signal peptide inserted into the vector pHCMV (Genlantis). Cells were transfected with PEIMAX (PolySciences) and allowed to secrete Env for 72 hours. Cell supernatant was concentrated and filtered and loaded on to *Galanthus nivalis* lectin agarose beads (Vector labs) and eluted with 1.0 M methyl- $\alpha$ -d-mannopyranoside. The eluted gp120 was further purified by SEC using Superdex 200 16/60 (GE Healthcare). T13 Fab was expressed by periplasmic secretion of both the light and heavy chains using pET-Duet. Cells were induced with IPTG and allowed to express Fab overnight at 16°C. Cells were then harvested by centrifugation, protease inhibitor cocktail set V (CalBiochem) was added, and passaged three times through a cell disruptor. Clarified cell lysate was loaded on a 5 mL HiTrap Protein G column and Fab was eluted using 1 M glycine pH 2.8. Affinity-purified Fab was then purified further by Mono S cation exchange. A complex of JR-FL gp120 core and T13 Fab was concentrated to 16 mg/ml and crystallized by sitting drop vapor diffusion in 20% PEG 3350, 0.2 M lithium chloride, 12.5 mM Tris, pH 8.0. Crystals were cryoprotected by addition of 30% glycerol to the mother liquor, and a data set to 6.0 Å was collected. Molecular replacement was carried out with PHASER. A shell script was used to cycle through 176 different Fab models using an in-house database of structurally aligned Fab coordinates derived from the PDB. A solution using F105-bound gp120 (PDB ID: 3HI1), truncated V1/V2 stem and  $\beta$ 20-21 loop, and the 176 Fab database placed gp120 and two different Fabs, which yielded the same solution. Env residues 91-116, 210-297, 330-395, 412-491 were used in the structure solution and the Fab from PDB ID 1HZH.

-gp120 solution: rotation (euler)  $\alpha$ ,  $\beta$ ,  $\gamma$  147.44, -100.52, 2.34; translation vector (Å) 44.20, 62.84, -43.19

-Fab solution: rotation (euler)  $\alpha$ ,  $\beta$ ,  $\gamma$  62.81, -60.86, 43.98; translation vector (Å) 258.09, 139.37, -93.15

Rigid body refinement was undertaken with PHENIX, and the structure was refined to an  $R_{\text{cryst}}$  of 0.31 ( $R_{\text{free}}$  of 0.46). No coordinate refinement was performed.

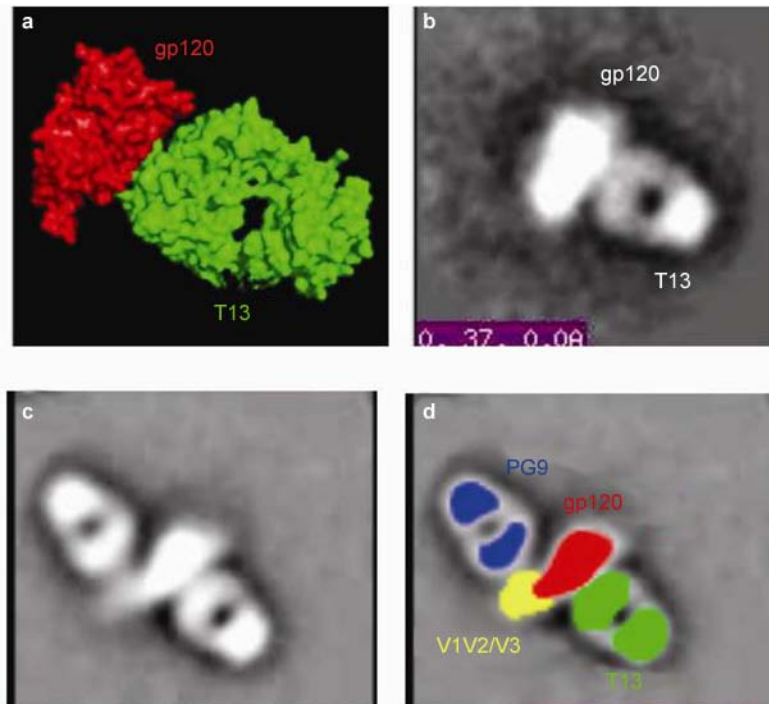

**Supplementary Figure 13. Negative stain of gp120-T13 and gp120-T13-PG9 complex.**

**a**, Crystal structure of gp120-T13 complex at 6Å. **b**, 2D class average of the same complex by EM. This view corresponds to view 7 in Supplementary Fig. 11. **c**, 2D class average of ternary complex of gp120-T13-PG9. **d**, Same as **b** but colored by component. This view corresponds to view 1 in Supplementary Fig. 11. Thus, the binary crystal and EM structures unambiguously define the location of T13 on one side of the strong rod-shaped gp120 density. These fits all orient the V1/V2/V3 loops into the additional plume of density adjacent to the other strong density for an Fab, which then is PG9. Additional evidence for this arrangement is provided by an EM titration experiment required to get higher populations of the ternary complex. Briefly, it was necessary to add excess PG9 to the stoichiometric, purified gp120-T13-PG9 complex after diluting the sample in preparation for deposition on the EM grid. Failure to do so resulted in a proportionally higher population of view 7 (Supplementary Fig. 11), which represents the gp120-T13 complex as discussed above.

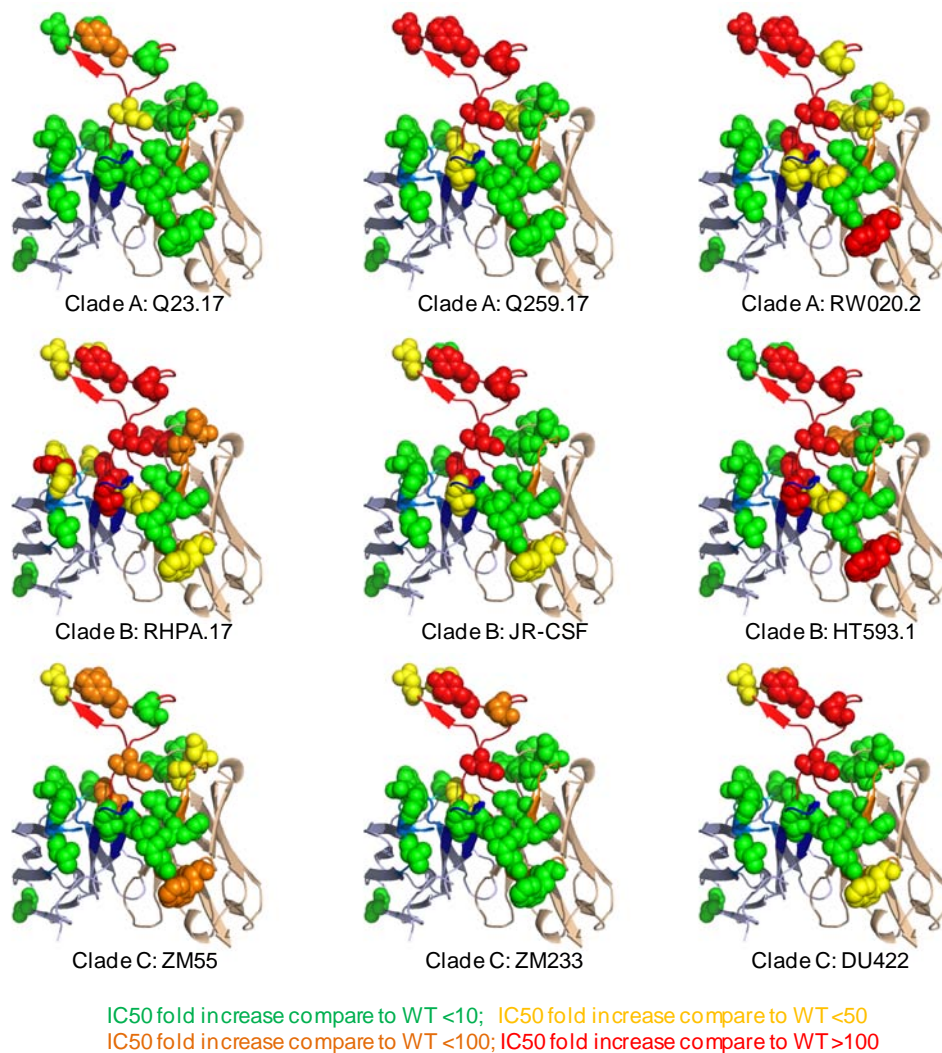

**Supplementary Figure 14. Functional definition of PG16 paratope by “arginine-scanning” mutagenesis.** 22 individual arginine mutants were assessed for neutralization on nine different strains of HIV-1. Residues mutated to arginine are displayed as spheres on a ribbon diagram of the unbound PG16 structure (Pancera et al., J. Virol., 2010), and colored according to the fold-increase in  $IC_{50}$  for the mutant relative to wild-type.



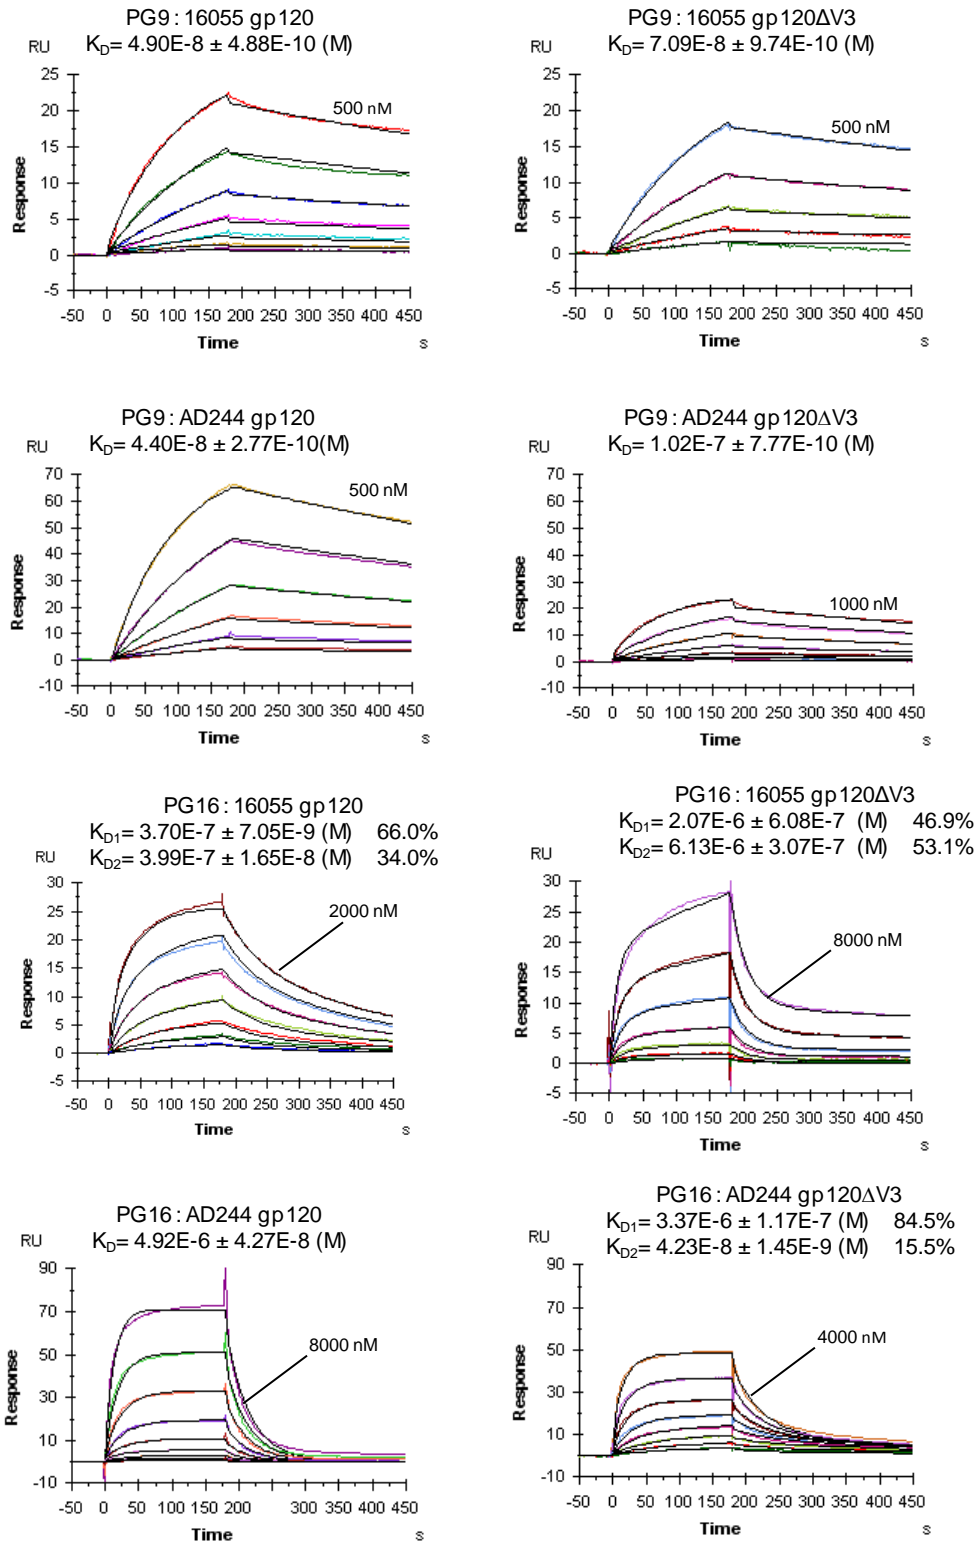

**Supplementary Figure 15. PG9 and PG16 binding to gp120 in the presence and absence of the V3 loop.** Full-length gp120 monomers (left column) or V3-deleted gp120 monomers (right column) were tested for binding to PG9 (top) and PG16 (bottom). Surface-plasmon resonance sensorgrams with their respective fitted curves (black) are shown, with the highest concentration of each 2-fold dilution series labeled. The equilibrium dissociation constant ( $K_D$ ) is shown above the sensorgrams. In curves fitted with a heterogenous model, separate  $K_D$ s are listed, along with contributing percentages for each component. Data were processed as described in Methods.

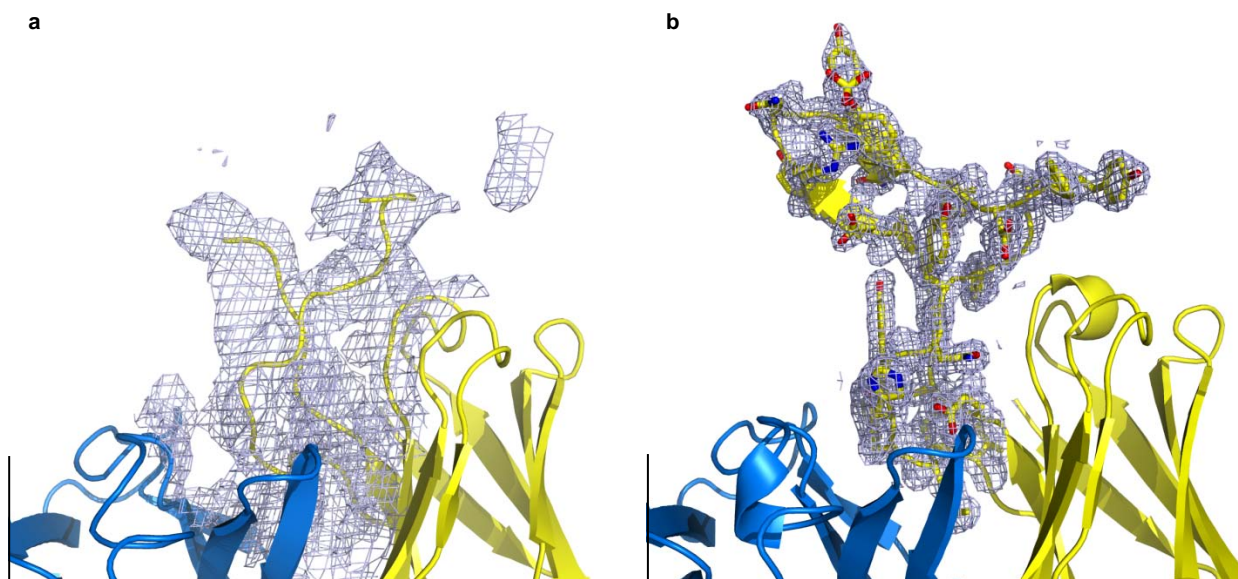

**Supplementary Figure 16. PG9 CDR H3 electron density in unbound and V1V2-bound structures.**

To determine the degree that unbound structures resembled complexed ones, we determined the structure of unbound PG9. PG9 crystals diffracted to 3.3 Å with 4 molecules in the asymmetric unit. In three of the four molecules that comprise the asymmetric unit, the CDR H3 appeared to be completely disordered, with weak density observed for only one molecule, consistent with the unbound PG9 CDR H3 being a highly mobile subdomain; in contrast, other regions of the unbound PG9-variable domains closely resembled the bound structures. We previously determined the unbound structure of PG16, which also displayed a flexible or more mobile CDR H3. Superposition of the unbound PG16 structure with that of PG9 in the PG9-V1V2 complex indicated that somatic differences focused primarily at the region N-terminal to the V1V2-interactive strand of the CDR H3 and to residues involved in glycan recognition. Overall, unbound PG9 and PG16 structures were compatible with an induced fit mechanism of recognition, where CDR H3 mobility enhances the ability of PG9 and PG16 to penetrate the flexible glycan shield that covers V1V2. **a**, Ribbon representation of the unbound PG9 Fab, zoomed in on the CDR H3. Heavy chain is yellow, and light chain is blue.  $2F_o - F_c$  electron density within 6 Å of the CDR H3 and contoured at 0.7  $\sigma$  is shown as a light blue mesh **b**, Ribbon representation of the 1FD6-ZM109-bound PG9 Fab, zoomed in on the CDR H3.  $2F_o - F_c$  electron density within 1.5 Å of the CDR H3 and contoured at 1.0  $\sigma$  is shown as a light blue mesh.

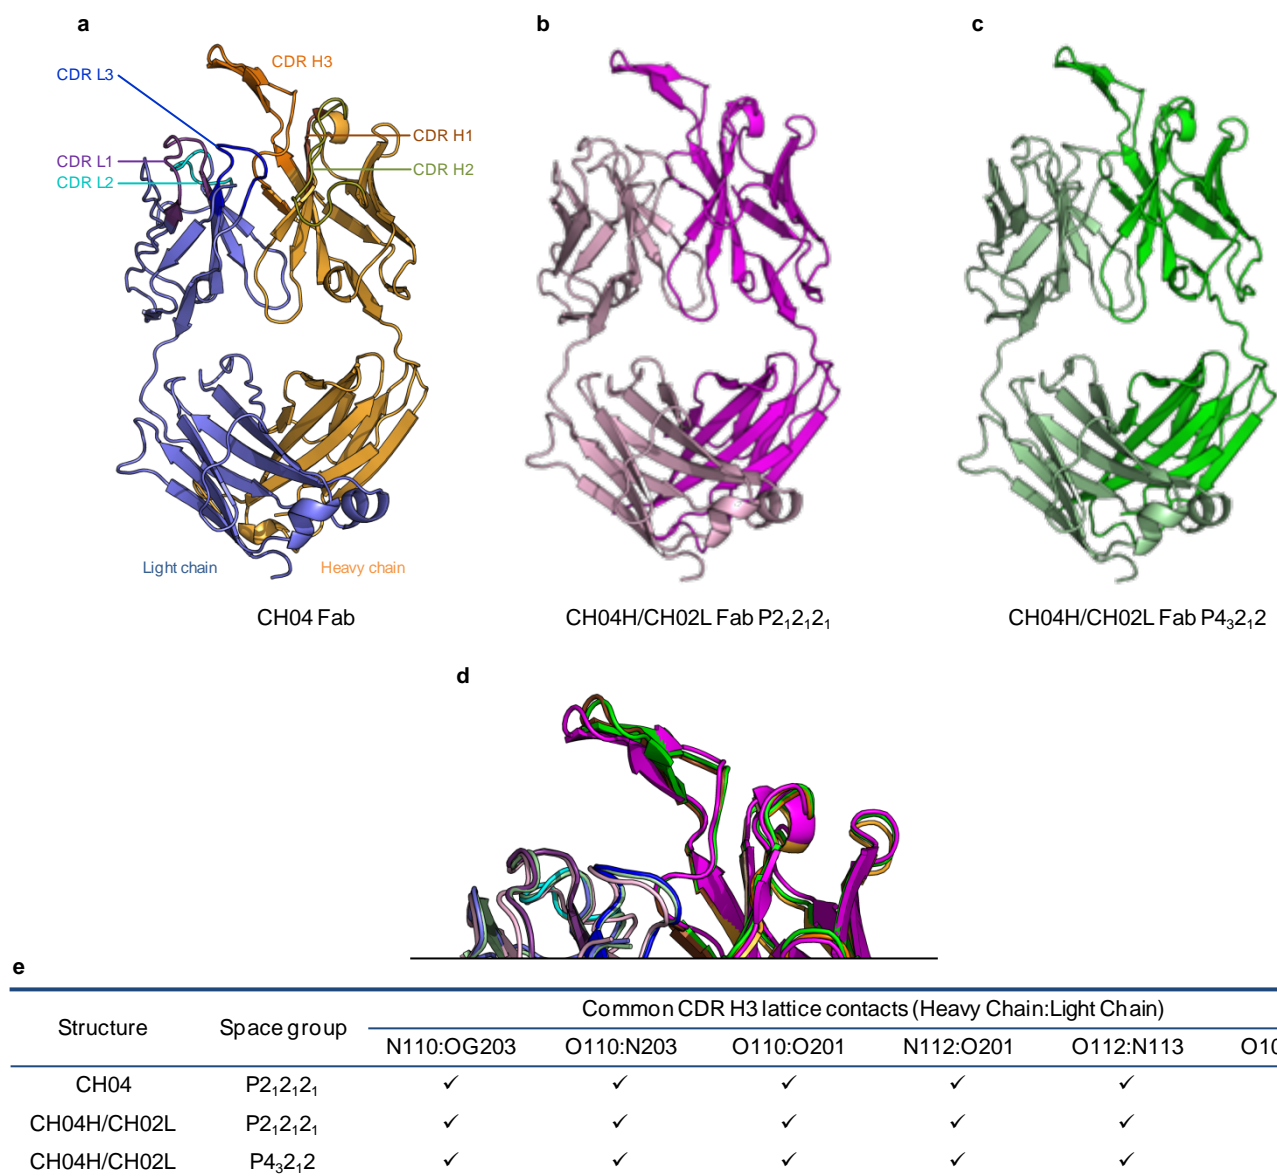

**Supplementary Figure 17. Unbound structures of CH04 Fab and of chimeric CH04H/CH02L Fab.** Antibodies CH01-CH04 form a clonal lineage, identified from a clade A-infected donor (CHAVI-0219), with heavy chain-derived from the VH3 family, the same as PG9/PG16 (Bonsignori et al., J. Virol., 2011). Neutralization characteristics of CH01-04 closely resemble those of PG9 and PG16, with a highly similar, alanine-mutagenesis-defined, target epitope. Fabs of CH01-CH03 formed small needles, which were not suitable for structural analysis (Supplementary Table 20). CH04 formed orthorhombic crystals that diffracted to 1.9 Å, with two molecules in the asymmetric unit, and structure determination and refinement led to an  $R_{\text{cryst}}$  of 19.6% ( $R_{\text{free}} = 23.8\%$ ) (Supplementary Table 19). Chimeric Fabs of CH04H/CH02L formed orthorhombic and tetragonal crystals that diffracted to 2.9 Å. **a.** Unbound structure of Fab CH04. Ribbon diagram displays heavy (orange) and light (blue) chains, with CDRs shaded as indicated. **b.** Unbound structure of orthorhombic Fab CH04H/CH02L. Ribbon diagram displays heavy (magenta) and light (light pink) chains. **c.** Unbound structure of tetragonal Fab CH04H/CH02L. Ribbon diagram displays heavy (green) and light (light green) chains. **d.** Superposition of the CDR H3s with color described in **a**, **b** and **c**. **e.** CDR H3 lattice contacts.

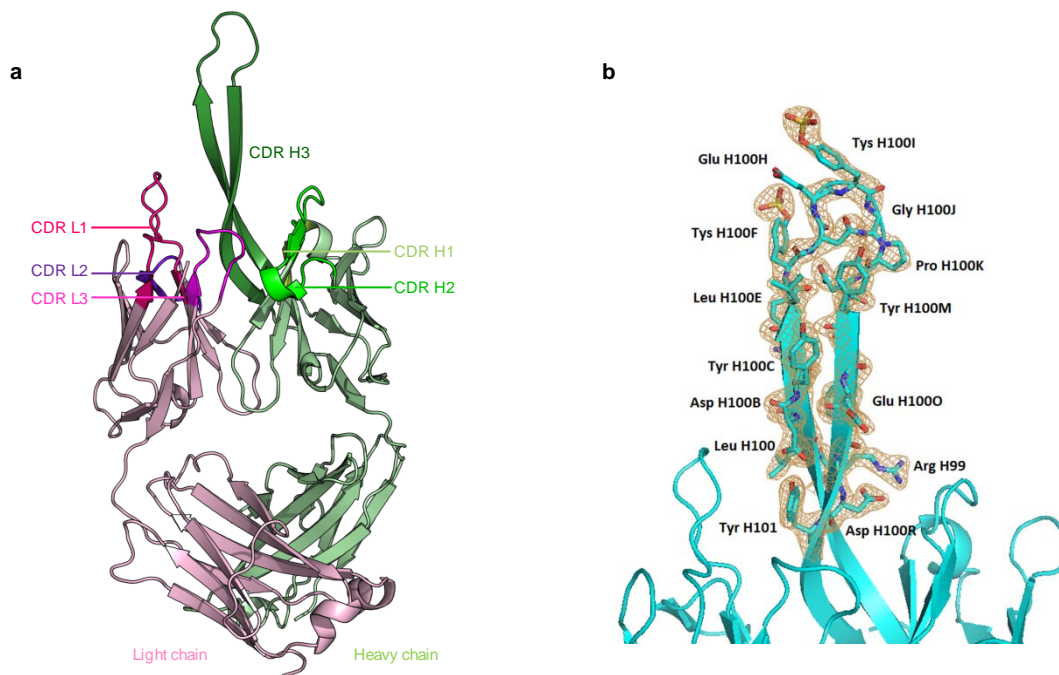

### Supplementary Figure 18. Unbound structure of PGT145 Fab.

Antibodies PGT141-145 form a clonal lineage, identified from a clade A- or D-infected donor (IAVI protocol G-84), with heavy chain-derived from the VH1 family (Walker et al., Nature, 2011). Neutralization characteristics of PGT141-145 closely resemble those of PG9 and PG16, although PGT145, the most effective member of this lineage, appeared to have greater tolerance for the type of glycan. Crystals of PGT145 diffracted to 2.3 Å, with 1 molecule in the asymmetric unit, and structure determination and refinement lead to an  $R_{\text{cryst}}$  of 19.1% ( $R_{\text{free}} = 22.6\%$ ) (Supplementary Table 19). **a.** Ribbon diagram displays heavy (green) and light (pink) chains, with CDRs shaded as indicated. **b.** PGT145 CDR H3 details with  $2F_o - F_c$  electron contoured at  $1 \sigma$  shown in brown.

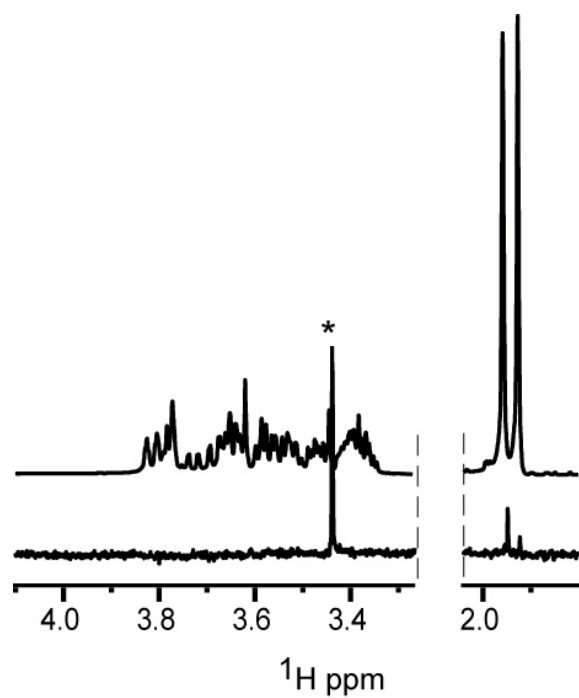

**Supplementary Figure 19. Binding of GlcNAc2 to PG9 by NMR.**

STD (lower) and reference (upper) NMR spectra of 1.5 mM GlcNAc2 in the presence of 15  $\mu$ M Fab PG9. (\*) Buffer impurity exhibiting nonspecific binding to PG9.

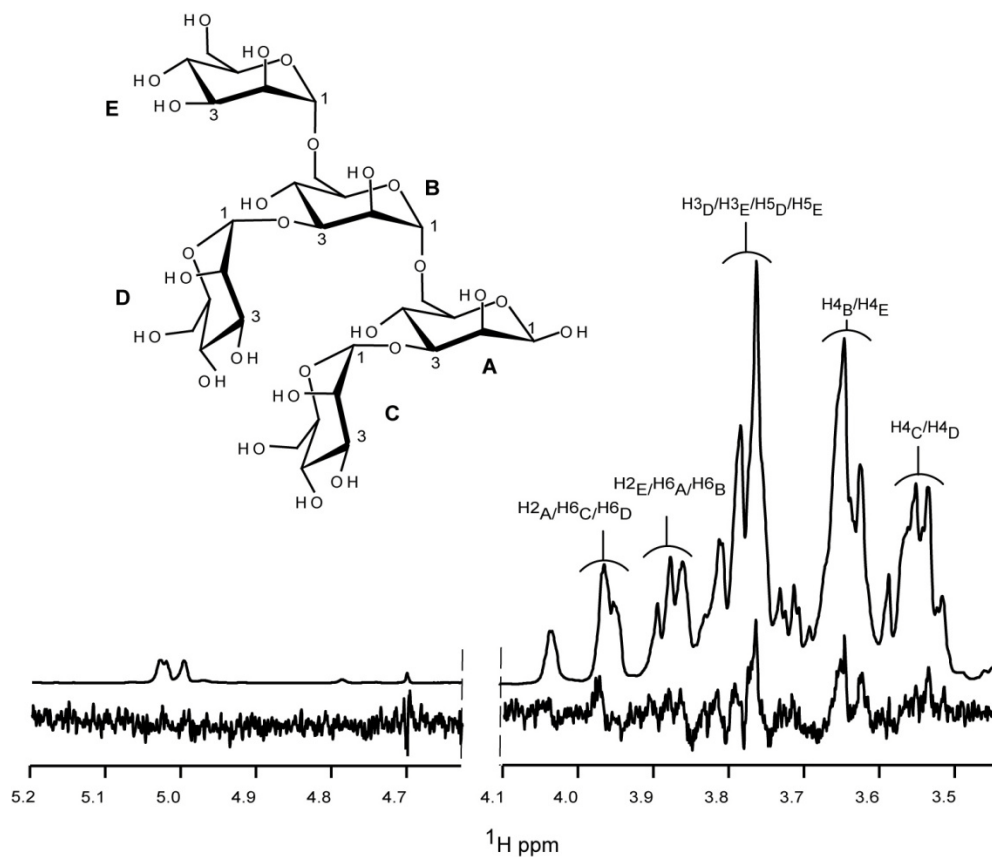

**Supplementary Figure 20. Binding of mannopentaose to PG9 by NMR.**

STD (lower) and reference (upper) NMR spectra of 1.5 mM mannopentaose (structure shown above) in the presence of 15  $\mu\text{M}$  Fab PG9. Protons that exhibit STD enhancements are labeled.
